# Supplementary material for: Internal consistency and factor structure of Jenkins Sleep Scale: cross-sectional cohort study among 80 000 adults
Source: PubMed Central journal article supplement — BMJ Open. 2021 Jan 18;11(1):e043276. doi: 10.1136/bmjopen-2020-043276 (PMC7813292; doi:10.1136/bmjopen-2020-043276), 2021-01-18
Supplement: bmjopen-2020-043276.draft_revisions.pdf [file bmjopen-2020-043276.draft_revisions.pdf]

# BMJ Open

BMJ Open is committed to open peer review. As part of this commitment we make the peer review history of every article we publish publicly available.

When an article is published we post the peer reviewers' comments and the authors' responses online. We also post the versions of the paper that were used during peer review. These are the versions that the peer review comments apply to.

The versions of the paper that follow are the versions that were submitted during the peer review process. They are not the versions of record or the final published versions. They should not be cited or distributed as the published version of this manuscript.

BMJ Open is an open access journal and the full, final, typeset and author-corrected version of record of the manuscript is available on our site with no access controls, subscription charges or pay-per-view fees (<http://bmjopen.bmj.com>).

If you have any questions on BMJ Open's open peer review process please email [info.bmjopen@bmj.com](mailto:info.bmjopen@bmj.com)

# BMJ Open

## Psychometric properties of Jenkins Sleep Scale: Internal consistency and factor structure in a working population of 80,000 adults

|                               |                                                                                                                                                                                                                                                                                                                                                                                                                                                                                                                                                                                                                                                                                                                                                |
|-------------------------------|------------------------------------------------------------------------------------------------------------------------------------------------------------------------------------------------------------------------------------------------------------------------------------------------------------------------------------------------------------------------------------------------------------------------------------------------------------------------------------------------------------------------------------------------------------------------------------------------------------------------------------------------------------------------------------------------------------------------------------------------|
| Journal:                      | <i>BMJ Open</i>                                                                                                                                                                                                                                                                                                                                                                                                                                                                                                                                                                                                                                                                                                                                |
| Manuscript ID                 | bmjopen-2020-043276                                                                                                                                                                                                                                                                                                                                                                                                                                                                                                                                                                                                                                                                                                                            |
| Article Type:                 | Original research                                                                                                                                                                                                                                                                                                                                                                                                                                                                                                                                                                                                                                                                                                                              |
| Date Submitted by the Author: | 11-Aug-2020                                                                                                                                                                                                                                                                                                                                                                                                                                                                                                                                                                                                                                                                                                                                    |
| Complete List of Authors:     | Juhola, Juhani; TYKS Turku University Hospital, Physical and Rehabilitation medicine<br>Arokoski, J. P. A.; Helsinki University Central Hospital, Department of Physical and rehabilitation medicine<br>Ervasti, Jenni; Finnish Institute of Occupational Health, Topeliuksenkatu 41 a A, FI-00250, Helsinki, Finland,<br>Kivimäki, Mika; University of Helsinki Faculty of Medicine, ; University College London, Dep. of Epidemiology and Public Health<br>Vahtera, Jussi; Turun Yliopisto, Dep Public Health; Finnish Institute of Occupational Health,<br>Myllyntausta, Saana; University of Turku,<br>Saltychev, M; Turku University Hospital and University ofTurku, Turku, Finland , Department of Physical and Rehabilitation Medicine |
| Keywords:                     | SLEEP MEDICINE, EPIDEMIOLOGY, OCCUPATIONAL & INDUSTRIAL MEDICINE                                                                                                                                                                                                                                                                                                                                                                                                                                                                                                                                                                                                                                                                               |
|                               |                                                                                                                                                                                                                                                                                                                                                                                                                                                                                                                                                                                                                                                                                                                                                |

SCHOLARONE™  
Manuscripts

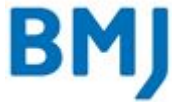

I, the Submitting Author has the right to grant and does grant on behalf of all authors of the Work (as defined in the below author licence), an exclusive licence and/or a non-exclusive licence for contributions from authors who are: i) UK Crown employees; ii) where BMJ has agreed a CC-BY licence shall apply, and/or iii) in accordance with the terms applicable for US Federal Government officers or employees acting as part of their official duties; on a worldwide, perpetual, irrevocable, royalty-free basis to BMJ Publishing Group Ltd ("BMJ") its licensees and where the relevant Journal is co-owned by BMJ to the co-owners of the Journal, to publish the Work in this journal and any other BMJ products and to exploit all rights, as set out in our [licence](#).

The Submitting Author accepts and understands that any supply made under these terms is made by BMJ to the Submitting Author unless you are acting as an employee on behalf of your employer or a postgraduate student of an affiliated institution which is paying any applicable article publishing charge ("APC") for Open Access articles. Where the Submitting Author wishes to make the Work available on an Open Access basis (and intends to pay the relevant APC), the terms of reuse of such Open Access shall be governed by a Creative Commons licence – details of these licences and which [Creative Commons](#) licence will apply to this Work are set out in our licence referred to above.

Other than as permitted in any relevant BMJ Author's Self Archiving Policies, I confirm this Work has not been accepted for publication elsewhere, is not being considered for publication elsewhere and does not duplicate material already published. I confirm all authors consent to publication of this Work and authorise the granting of this licence.

1  
2 **Psychometric properties of Jenkins Sleep Scale: Internal consistency and factor structure in a working**  
3 **population of 80,000 adults**  
4

5  
6 *Running head:* Psychometric properties of Jenkins Sleep Scale  
7

8 Juhani Juhola MD<sup>1</sup>, Jari Arokoski MD, PhD<sup>2</sup>, Jenni Ervasti<sup>3</sup>, Mika Kivimäki PhD<sup>3,4,5</sup>, Jussi Vahtera PhD, MD<sup>6</sup>,  
9 Saana Myllyntausta<sup>6,7</sup>, Mikhail Saltychev MD, PhD<sup>1</sup>  
10

11 <sup>1</sup> Department of Physical and Rehabilitation Medicine, Turku University Hospital and University of Turku,  
12 Turku, Finland  
13

14 <sup>2</sup> Department of Physical and Rehabilitation Medicine, Helsinki University Hospital and University of  
15 Helsinki, Helsinki, Finland  
16

17 <sup>3</sup> Finnish Institute of Occupational Health, Helsinki, Finland  
18

19 <sup>4</sup> Clinicum, Faculty of Medicine, University of Helsinki, Helsinki, Finland  
20

21 <sup>5</sup> Department of Epidemiology and Public Health, University College London Medical School, London,  
22 United Kingdom  
23

24 <sup>6</sup> Department of Public Health, University of Turku and Turku University Hospital, Turku, Finland  
25

26 <sup>7</sup> School of Educational Sciences and Psychology, Psychology, University of Eastern Finland, Joensuu,  
27 Finland  
28

29  
30  
31  
32  
33 *Address for correspondence:*

34 Juhani Juhola, Department of Physical and Rehabilitation Medicine, Turku University Hospital, PO Box 52,  
35 FI-20521, Turku, Finland  
36

37 E-mail: [juhani.juhola@turku.fi](mailto:juhani.juhola@turku.fi), Tel.: +358 50 527 57 56, Fax: +358 2 313 3730  
38

39  
40  
41  
42 *Keywords:* sleep disorder, psychometrics, validity  
43  
44  
45  
46  
47  
48  
49  
50  
51  
52  
53  
54  
55  
56  
57  
58  
59  
60

## ABSTRACT

### Objective

To assess the internal consistency and construct validity of the Finnish translation of the Jenkins Sleep Scale (JSS) in a large, healthy working-age population with diverse work characteristics.

### Methods

Survey-based study amongst employees of 10 towns and 6 hospital districts in Finland (the Finnish Public Sector study). The internal consistency was defined by a Cronbach's alpha. Exploratory and confirmatory factor analyses were used to evaluate the construct structure of the JSS.

### Results

Of 81,136 respondents, 14,890 (18%) were men and 66,246 (82%) were women. Their average age was 52.1 (13.2) years. Of the respondents, 41,823 (52%) were sleeping seven or less hours per night. The mean JSS total score was 6.4 (4.8) points. The JSS demonstrated high internal consistency with an alpha of 0.80 (95% CI 0.xx-0.xx). Exploratory factor analysis supported a one-factor solution with eigenvalue of 1.94. Confirmatory factor analysis showed that all four items were positively correlated with a single common factor explaining 44% to 61% of common factor's variance.

### Conclusions

The Finnish translation of Jenkins Sleep Scale was found to be a unidimensional scale with good internal consistency. As such, the scale may be recommended as a practicable questionnaire when studying sleep disorders in a healthy working-age population.

### Strengths and limitations of this study

To our knowledge, this was the first study on the psychometrics of the Finnish translation of the JSS.

The cohort of over 80,000 respondents represented a wide spectrum of occupations from managers to manual workers.

Inequality in gender distribution may overestimate the prevalence of sleep disorders in the studied cohort.

The JSS may be recommended as an easy-to-do questionnaire instrument for the studying of sleep disorders in a healthy working-age population.

## INTRODUCTION

Several different questionnaires have been developed to assess the severity of sleep problems [1]. The Jenkins Sleep Scale (JSS), developed as a brief and standardized test for sleep disturbances in 1998, has been one of the most commonly used questionnaires in epidemiological studies [1-4]. The JSS has been translated in several languages [5-10] and found to be valid and reliable amongst patients with different health problems including rheumatoid arthritis [10], psoriatic arthritis [9], ankylosing spondylitis [7], fibromyalgia[5, 11], chest pain [12], and post cardiac surgery patients [2]. However, only a few studies have evaluated the psychometric properties of the JSS in large non-clinical populations [2, 3, 8, 13, 14].

Previous studies have found the JSS to be internally consistent amongst patients with fibromyalgia [5, 11], rheumatoid arthritis [10], ankylosing spondylitis [7] and psoriatic arthritis[9] as indicated by Cronbach's alphas between 0.7 and 0.9. Several studies has assessed the internal consistency of the JSS in general and/or healthy populations similarly reporting good to excellent Cronbach's alpha that vary between 0.8 and 0.9 [2, 3, 6, 8, 13, 14] Only three previous studies have assessed the factor structure of the JSS finding the JSS to be a unidimensional scale [3, 6, 8] The construct structure of the JSS analysis has been assessed by a single study using a confirmatory factor that produced strong correlations with common factor for all four items [3].

Overall, there is uncertainty concerning the psychometric behavior of the JSS especially regarding its factor structure in healthy and/or general populations. The psychometric properties of Finnish translation of the JSS have not been studied yet. To address this limitation, the aim of this study was to assess the internal consistency and construct validity of the Finnish translation of the JSS in a large healthy working-age population.

## METHODS

Participants were from the Finnish Public Sector (FPS) study cohort of employees of 10 towns and 6 hospital districts[15]. Data were sourced from the survey in 2016 – 2017 administered to the FPS sub-cohorts (average response rate 70%). Individual-level survey data cannot be made publicly available, but information on the data and analyses are available upon request to the corresponding author. The ethics committee of the Hospital District of Helsinki and Uusimaa has approved the study.

Age was defined in full years at the time of survey response. Body mass index (BMI) was defined as weight in kg/height in m<sup>2</sup>. The level of physical activity was calculated from the survey responses and converted into metabolic equivalent of task (MET). Alcohol consumption was obtained from the survey and converted into g/week. The respondents were asked about their usual amount of sleep hours per 24 hours with the following nine response alternatives:  $\leq 6$  hours, 6.5 hours, 7 hours, 7.5 hours, 8 hours, 8.5 hours, 9 hours, 9.5 hours, and  $\geq 10$  hours.

Jenkins Sleep Scale (JSS) is a four-item questionnaire to follow common sleep problems[2]. The frequency of sleep problems in the last month is evaluated using four items: the difficulty to fall asleep, wake up at night, difficulty to stay asleep, and nonrestorative sleep (i.e. waking up after the usual amount of sleep feeling tired and worn out). Each item is rated on a Likert-like scale from zero to five, where zero is “never”, 1 is “1- 3 days”, 2 is “about 1 night/week”, 3 is “2-4 nights/week”, 4 is “5-6 nights/week” and 5 is “almost every night”. The total score is a simple sum of all four items’ scores and ranges from zero (no sleep problems) to 20 (most sleep problems). The score of 11 is a cut-off – a score  $< 12$  is defined as little of sleep disturbances and a score  $> 11$  is understood as high frequency of sleep disturbances[16].

### *Patient and public involvement*

Participants of research were not involved in setting the study question and outcome measures and were not involved in the design and implementation of the study or writing the manuscript.

### **Statistical analysis**

#### *Internal consistency and exploratory factor analysis*

The internal consistency was defined by a Cronbach’s alpha reported along with its one-sided (lower) 95% confidence limit (95% CL). The  $\alpha \geq 0.9$  was considered excellent,  $\geq 0.8$  good,  $\geq 0.7$  acceptable,  $\geq 0.6$  questionable,  $\geq 0.5$  poor, and  $< 0.5$  was considered unacceptable. Exploratory factor analysis (EFA) was used to approximate the construct structure of the JSS. The goal was to determine whether the JSS

1  
2 measures only one latent trait (= sleep disturbances) or if there are other possible significant latent  
3 variables affecting the results. The results were analyzed both numerically and graphically. Exploratory  
4 factor analysis (principal factors) was applied with a minimum eigenvalue for retention set at >1.0 (Kaiser's  
5 rule). The varimax rotation was applied. Retained and excluded factors were also explored visually on a  
6 scree plot along with the parallel analysis.  
7  
8  
9

#### 10 *Confirmatory factor analysis*

11  
12  
13 The estimation procedure used the maximum likelihood method considering covariances supplied as  
14 input being unbiased. For simplicity, the estimates were reported in standardized form as correlation  
15 coefficients. A correlation <0.2 was considered poor, from 0.21 to 0.4 fair, from 0.41 to 0.6 moderate,  
16 from 0.61 to 0.8 substantial, and >0.8 perfect. In addition, the coefficients of determination were  
17 calculated to show the proportion of variance in common "sleep disturbances" construct that can be  
18 explained by the items. Finally, the coefficient of determination for the entire model was calculated.  
19  
20  
21  
22

23  
24 In order to assess how well the model matches the observed data, the root mean square error of  
25 approximation (RMSEA) was used as a primary index. First, the model fit was tested assuming there were  
26 no covariances between unique factors. After that, the modification indices suggested by the software  
27 were used to add covariance between factors (double-headed arrows in Figure 2) one at a time, each time  
28 testing the RMSEA closeness to the value of < 0.05, or, at least, <0.08 – the threshold for accepting the  
29 model fit. Every insertion was considered plausible if it made logical sense and did not violate the  
30 assumption that the common and the unique factors are uncorrelated. After achieving the RMSEA value  
31 of <0.05, no further covariances were imputed. The goodness of fit was assessed using a chi-square test.  
32 Also, the Akaike's and Bayesian information criteria (AIC and BIC), comparative fit index (CFI) and the  
33 Tucker-Lewis index (TLI) were calculated. The AIC and BIC were considered good if they were close to 1.0.  
34  
35  
36  
37  
38  
39  
40

41 The analyses were performed using Stata/IC Statistical Software: Release 16. College Station (StataCorp  
42 LP, TX, USA).  
43  
44  
45  
46  
47  
48  
49  
50  
51  
52  
53  
54  
55  
56  
57  
58  
59  
60



## RESULTS

Of 81,136 respondents, 14,890 (18%) were men and 66,246 (82%) were women. Their mean age was 52.1 (standard deviation [SD] = 13.2) years, body mass index 26.2 (SD = 4.7) kg/m<sup>2</sup>, physical activity 29.4 (SD = 25.3) METs/week, and alcohol consumption 49.7 (SD = 90.9) g/week (equivalent to 5 units of alcohol per week). Of the respondents, 41,823 (52%) were sleeping seven or less hours per night. The mean JSS total score was 6.4 (4.8) points.

The JSS demonstrated a substantial internal consistency with alpha 0.80 (lower 95% CL 0.80). The exploratory factor analysis resulted in one retaining factor with eigenvalue of 1.94 based on Kaiser criterion (Table 1 and Figure 1). Three other factors had eigenvalues between -0.03 and -0.18 and thus explained variance less the observed variables.

The confirmatory factor analysis showed that all four items positively correlated with a common factor explaining from 44% up to 61% of the variance of the common factor (Table 2 and Figure 2). The highest correlation 0.78 ( $r^2=0.61$ ) was observed for the third item "waking up and trouble falling asleep again". Other items demonstrated similar and slightly lower correlations between 0.66 and 0.67 ( $r^2=0.44$  to 0.45). The model obtained a good fit after adding one covariance between second and third items: 0.26 (95% confidence interval 0.25 to 0.28). After that, the RMSEA of the model was 0.03 (Table 3).

## DISCUSSION

In this large cohort study, the JSS was found to be an internally consistent scale. Exploratory factor analysis suggested the unidimensionality of the JSS. In addition, confirmatory factor analysis demonstrated a single-factor structure with only one mild aberration; the JSS item “waking up and trouble falling asleep again” seemed to show higher coefficient of determination than any of the other items.

To our knowledge, this was the first study on the psychometrics of the Finnish translation of the JSS. The cohort of over 80,000 respondents represented a wide spectrum of occupations from managers to manual workers. However, the generalizability of the results might be compromised by the following aspects. The studied cohort was predominated by women. It has previously been stated that sleep problems are more common among women meaning that this inequality in gender distribution may overestimate the prevalence of sleep disorders in the studied cohort [3]. While overall working age could be understood as an age between early adulthood and the age of retirement, the mean age of the respondents was 52 years, covering mainly the last third of the working life span.

The results are in line with several previous studies that have found the JSS to be a unidimensional scale with excellent internal consistency [3, 6, 8]. The Cronbach’s alpha of 0.8 seen in the present study was close to the estimates reported by previous research in both general population and populations of people with different health conditions [2, 3, 5-11, 13, 14]. While the JSS has been studied by employing alpha and exploratory factor analysis by several studies, a confirmatory factor analysis has previously been used by only a single study (Tibubos et al. 2020). The correlations of four items with a common factor seen in study by Tibubos et al. resembled the estimates observed in the present study with one exception. The present results demonstrated the greatest correlation for the item “waking up and trouble falling asleep again”, being in line with Tibubos et al., but, contrary to our result, item “waking up feeling tired” had the smallest (out of four) estimate in their study. This difference might be explained by differences in the studied cohorts e.g. in gender distribution and work status. Indeed, the present study represents a population that is probably healthier than general population. In addition, it is possible, though unlikely, that some differences might have occurred due to the linguistic variability between the two translations.

Further research may reveal more details on the JSS psychometrics, for example, its properties based on an item response theory analysis. Especially confirmatory factor analysis may be recommended for future research, as the knowledge on the JSS factor structure is still scarce.

## Conclusions

The JSS was found to be a unidimensional scale with good internal consistency. As such, the JSS may be recommended as an easy-to-do questionnaire instrument for the studying of sleep disorders in a healthy working-age population.

1  
2  
3  
4  
5  
6  
7  
8  
9  
10  
11  
12  
13  
14  
15  
16  
17  
18  
19  
20  
21  
22  
23  
24  
25  
26  
27  
28  
29  
30  
31  
32  
33  
34  
35  
36  
37  
38  
39  
40  
41  
42  
43  
44  
45  
46  
47  
48  
49  
50  
51  
52  
53  
54  
55  
56  
57  
58  
59  
60

For peer review only

**TABLES AND FIGURES**

Table 1. Exploratory factor analysis of loadings of the Jenkins Sleep Scale items

| Jenkin's Sleep Scale Items                    | Factor #1 | Uniqueness |
|-----------------------------------------------|-----------|------------|
| Trouble falling asleep                        | 0.62      | 0.61       |
| Waking up but no trouble falling asleep again | 0.72      | 0.48       |
| Waking up and trouble falling asleep again    | 0.79      | 0.37       |
| Waking up feeling tired                       | 0.63      | 0.60       |

For peer review only

Table 2. Confirmatory factor analysis of Jenkins Sleep Scale – correlation between observed and predicted estimates (r) along with coefficient of determination ( $r^2$ )

| Estimates                                     | Variance |           |          | r    | 95% CI |       | $r^2$ |
|-----------------------------------------------|----------|-----------|----------|------|--------|-------|-------|
|                                               | Fitted   | Predicted | Residual |      | Lower  | Upper |       |
| Trouble falling asleep                        | 1.63     | 0.71      | 0.92     | 0.66 | 0.66   | 0.67  | 0.44  |
| Waking up but no trouble falling asleep again | 2.83     | 1.29      | 1.55     | 0.67 | 0.67   | 0.68  | 0.45  |
| Waking up and trouble falling asleep again    | 2.40     | 1.47      | 0.92     | 0.78 | 0.78   | 0.79  | 0.61  |
| Waking up feeling tired                       | 2.28     | 1.02      | 1.26     | 0.67 | 0.66   | 0.68  | 0.45  |
| Overall                                       |          |           |          |      |        |       | 0.78  |

For peer review only

Table 3. Confirmatory factor analysis of Jenkins Sleep Scale– goodness of fit

| Fit statistic        | Value     | Description                              |
|----------------------|-----------|------------------------------------------|
| Likelihood ratio     |           |                                          |
| chi <sup>2</sup>     | 84.49     | model vs. saturated                      |
| <i>p</i> -value      | <0.01     |                                          |
| Population error     |           |                                          |
| RMSEA                | 0.03      | Root mean squared error of approximation |
| 90% CI, lower bound  | 0.03      |                                          |
| 90% CI, upper bound  | 0.04      |                                          |
| <i>p</i> -value      | 1.00      | Probability RMSEA ≤ 0.05                 |
| Information criteria |           |                                          |
| AIC                  | 1,036,000 | Akaike's information criterion           |
| BIC                  | 1,037,000 | Bayesian information criterion           |
| Baseline comparison  |           |                                          |
| CFI                  | 1.00      | Comparative fit index                    |
| TLI                  | 1.00      | Tucker-Lewis index                       |
| Size of residuals    |           |                                          |
| SRMR                 | 0.01      | Standardized root mean squared residual  |
| CD                   | 0.78      | Coefficient of determination             |

**Contributorship statement**

All the authors substantially contributed to the conception and design of the work, drafting the work and revised it critically for important intellectual content, interpreted the data, and finally approved the version published. All the authors achieved an agreement to be accountable for all aspects of the work in ensuring that questions related to the accuracy or integrity of any part of the work are appropriately investigated and resolved. MS was responsible for the main data analysis. JV and MK were responsible for the acquisition of data. JV is a guarantor.

**Competing interests**

The authors do not have any associations with commercial entities that provided support for the work reported in the submitted manuscript. The authors do not have any associations with commercial entities that could be viewed as having an interest in the general area of the submitted manuscript. The authors do not have any similar financial associations involving their spouse or their children under 18 years of age. The authors do not have any non-financial associations that may be relevant to the submitted manuscript.

**Funding**

This study was supported by funding granted by the Juho Vainio Foundation, Finland (to TL); the Academy of Finland (Grants 286294, 294154 and 319246 to SS; 633666 to MK; 309526 to TL); the Finnish Ministry of Education and Culture (to SS); NordForsk (to MK and JV); the UK MRC (Grant K013351 to MK) and The Finnish Environment Fund (Grants 190172 and 118060 to SM)

**Data sharing statement**

The data generated by this research that supports the article will be made available through a request to a corresponding author forwarding the request to JE, who manages the data of the survey, upon publication of the article. Only anonymized questionnaire data is available to share.

## REFERENCES

1. Lallukka, T., A. Dregan, and D. Armstrong, *Comparison of a sleep item from the General Health Questionnaire-12 with the Jenkins Sleep Questionnaire as measures of sleep disturbance*. J Epidemiol, 2011. **21**(6): p. 474-80.
2. Jenkins, C.D., et al., *A scale for the estimation of sleep problems in clinical research*. J Clin Epidemiol, 1988. **41**(4): p. 313-21.
3. Tibubos, A.N., et al., *Measurement invariance, validation and normative data of the Jenkins Sleep Scale-4 (JSS-4) in the German general population across the life span*. J Psychosom Res, 2020. **130**: p. 109933.
4. Vahtera, J., et al., *Sleep disturbances as a predictor of long-term increase in sickness absence among employees after family death or illness*. Sleep, 2006. **29**(5): p. 673-82.
5. Unal-Ulutatar, C. and T. Ozsoy-Unubol, *Psychometric properties of Turkish version of Jenkins sleep scale in fibromyalgia syndrome*. Adv Rheumatol, 2020. **60**(1): p. 22.
6. Salman, M., et al., *Psychometric Validation of the Urdu Version of the Jenkins Sleep Evaluation Questionnaire*. Age (mean±SD), 2018. **21**: p. 0.84.
7. Duruoz, M.T., et al., *Assessment of the validity and reliability of the Jenkins Sleep Scale in ankylosing spondylitis*. Int J Rheum Dis, 2019. **22**(2): p. 275-279.
8. Reis, C., et al., *Translation, cross-cultural adaptation and psychometric properties of the Jenkins Sleep Scale in a sample of Portuguese shift workers*. 2014.
9. Duruöz, M.T., et al., *Validity and reliability of the Turkish version of the Jenkins Sleep Scale in psoriatic arthritis*. Rheumatol Int, 2018. **38**(2): p. 261-265.
10. Duruöz, M.T., et al., *The Validity and Reliability of Turkish Version of the Jenkins Sleep Evaluation Scale in Rheumatoid Arthritis*. Arch Rheumatol, 2018. **33**(2): p. 160-167.
11. Crawford, B.K., et al., *Assessing sleep in fibromyalgia: investigation of an alternative scoring method for the Jenkins Sleep Scale based on data from randomized controlled studies*. Clin Exp Rheumatol, 2010. **28**(6 Suppl 63): p. S100-9.
12. Jerlock, M., et al., *Coping strategies, stress, physical activity and sleep in patients with unexplained chest pain*. BMC Nurs, 2006. **5**: p. 7.
13. Nasermoaddeli, A., et al., *Association of sleep quality and free time leisure activities in Japanese and British civil servants*. J Occup Health, 2005. **47**(5): p. 384-90.
14. Ornat, L., et al., *Assessment of subjective sleep disturbance and related factors during female mid-life with the Jenkins Sleep Scale*. Maturitas, 2014. **77**(4): p. 344-50.
15. Kivimäki, M., et al., *Socioeconomic position, co-occurrence of behavior-related risk factors, and coronary heart disease: the Finnish Public Sector study*. American journal of public health, 2007. **97**(5): p. 874-879.
16. Monterrosa-Castro, Á., et al., *Instruments to study sleep disorders in climacteric women*. Sleep Science, 2016. **9**(3): p. 169-178.



1  
2  
3  
4  
5  
6  
7  
8  
9  
10  
11  
12  
13  
14  
15  
16  
17  
18  
19  
20  
21  
22  
23  
24  
25  
26  
27  
28  
29  
30  
31  
32  
33  
34  
35  
36  
37  
38  
39  
40  
41  
42  
43  
44  
45  
46  
47  
48  
49  
50  
51  
52  
53  
54  
55  
56  
57  
58  
59  
60

Figure 1. Exploratory factor analysis of Jenkins Sleep Scale – scree plot with parallel analysis

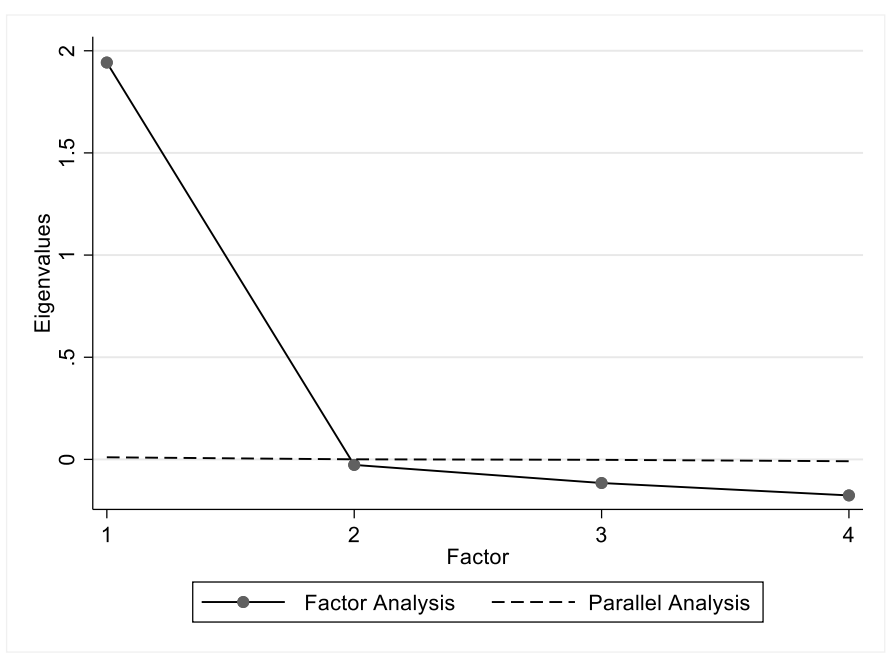

Peer review only

Figure 2. Confirmatory factor analysis of Jenkins Sleep Scale

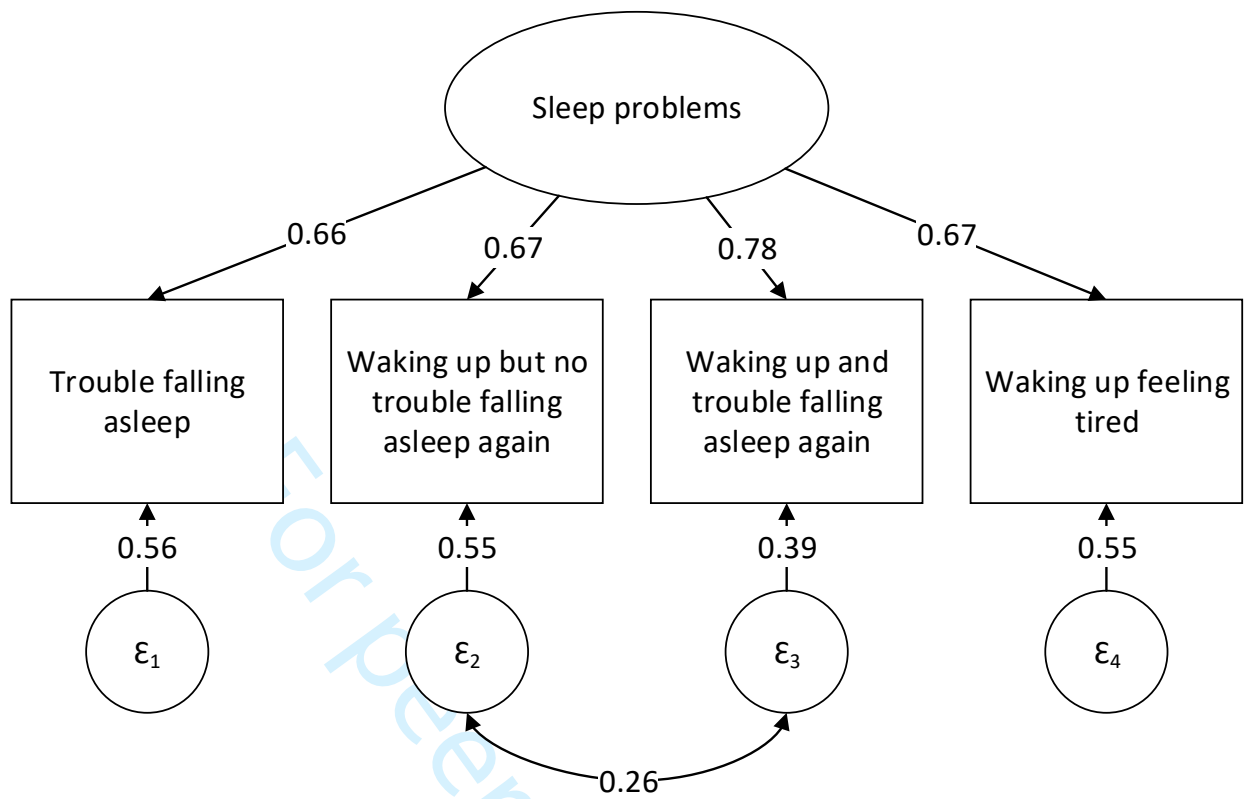

# Reporting checklist for qualitative study.

Based on the SRQR guidelines.

## Instructions to authors

Complete this checklist by entering the page numbers from your manuscript where readers will find each of the items listed below.

Your article may not currently address all the items on the checklist. Please modify your text to include the missing information. If you are certain that an item does not apply, please write "n/a" and provide a short explanation.

Upload your completed checklist as an extra file when you submit to a journal.

In your methods section, say that you used the SRQR reporting guidelines, and cite them as:

O'Brien BC, Harris IB, Beckman TJ, Reed DA, Cook DA. Standards for reporting qualitative research: a synthesis of recommendations. *Acad Med.* 2014;89(9):1245-1251.

|                              | Reporting Item                                                                                                                                                                                                                                          | Page Number |
|------------------------------|---------------------------------------------------------------------------------------------------------------------------------------------------------------------------------------------------------------------------------------------------------|-------------|
| <b>Title</b>                 |                                                                                                                                                                                                                                                         | 1           |
|                              | <a href="#">#1</a> Concise description of the nature and topic of the study identifying the study as qualitative or indicating the approach (e.g. ethnography, grounded theory) or data collection methods (e.g. interview, focus group) is recommended |             |
| <b>Abstract</b>              |                                                                                                                                                                                                                                                         | 2           |
|                              | <a href="#">#2</a> Summary of the key elements of the study using the abstract format of the intended publication; typically includes background, purpose, methods, results and conclusions                                                             |             |
| <b>Introduction</b>          |                                                                                                                                                                                                                                                         | 3           |
| Problem formulation          | <a href="#">#3</a> Description and significance of the problem / phenomenon studied: review of relevant theory and empirical work; problem statement                                                                                                    | 3           |
| Purpose or research question | <a href="#">#4</a> Purpose of the study and specific objectives or questions                                                                                                                                                                            | 3           |

|    |                              |                                                                                                                                                                                                                                                                                                                                                                                                                                                                                                                                                                                                                                      |       |
|----|------------------------------|--------------------------------------------------------------------------------------------------------------------------------------------------------------------------------------------------------------------------------------------------------------------------------------------------------------------------------------------------------------------------------------------------------------------------------------------------------------------------------------------------------------------------------------------------------------------------------------------------------------------------------------|-------|
| 1  | <b>Methods</b>               |                                                                                                                                                                                                                                                                                                                                                                                                                                                                                                                                                                                                                                      | 4     |
| 2  |                              |                                                                                                                                                                                                                                                                                                                                                                                                                                                                                                                                                                                                                                      |       |
| 3  | Qualitative approach and     | <a href="#">#5</a>                                                                                                                                                                                                                                                                                                                                                                                                                                                                                                                                                                                                                   | 4     |
| 4  | research paradigm            | Qualitative approach (e.g. ethnography, grounded theory, case study, phenomenology, narrative research) and guiding theory if appropriate; identifying the research paradigm (e.g. postpositivist, constructivist / interpretivist) is also recommended; rationale. The rationale should briefly discuss the justification for choosing that theory, approach, method or technique rather than other options available; the assumptions and limitations implicit in those choices and how those choices influence study conclusions and transferability. As appropriate the rationale for several items might be discussed together. |       |
| 5  |                              |                                                                                                                                                                                                                                                                                                                                                                                                                                                                                                                                                                                                                                      |       |
| 6  |                              |                                                                                                                                                                                                                                                                                                                                                                                                                                                                                                                                                                                                                                      |       |
| 7  |                              |                                                                                                                                                                                                                                                                                                                                                                                                                                                                                                                                                                                                                                      |       |
| 8  |                              |                                                                                                                                                                                                                                                                                                                                                                                                                                                                                                                                                                                                                                      |       |
| 9  |                              |                                                                                                                                                                                                                                                                                                                                                                                                                                                                                                                                                                                                                                      |       |
| 10 |                              |                                                                                                                                                                                                                                                                                                                                                                                                                                                                                                                                                                                                                                      |       |
| 11 |                              |                                                                                                                                                                                                                                                                                                                                                                                                                                                                                                                                                                                                                                      |       |
| 12 |                              |                                                                                                                                                                                                                                                                                                                                                                                                                                                                                                                                                                                                                                      |       |
| 13 |                              |                                                                                                                                                                                                                                                                                                                                                                                                                                                                                                                                                                                                                                      |       |
| 14 |                              |                                                                                                                                                                                                                                                                                                                                                                                                                                                                                                                                                                                                                                      |       |
| 15 |                              |                                                                                                                                                                                                                                                                                                                                                                                                                                                                                                                                                                                                                                      |       |
| 16 |                              |                                                                                                                                                                                                                                                                                                                                                                                                                                                                                                                                                                                                                                      |       |
| 17 |                              |                                                                                                                                                                                                                                                                                                                                                                                                                                                                                                                                                                                                                                      |       |
| 18 |                              |                                                                                                                                                                                                                                                                                                                                                                                                                                                                                                                                                                                                                                      |       |
| 19 |                              |                                                                                                                                                                                                                                                                                                                                                                                                                                                                                                                                                                                                                                      |       |
| 20 | Researcher characteristics   | <a href="#">#6</a>                                                                                                                                                                                                                                                                                                                                                                                                                                                                                                                                                                                                                   | 1     |
| 21 | and reflexivity              | Researchers' characteristics that may influence the research, including personal attributes, qualifications / experience, relationship with participants, assumptions and / or presuppositions; potential or actual interaction between researchers' characteristics and the research questions, approach, methods, results and / or transferability                                                                                                                                                                                                                                                                                 |       |
| 22 |                              |                                                                                                                                                                                                                                                                                                                                                                                                                                                                                                                                                                                                                                      |       |
| 23 |                              |                                                                                                                                                                                                                                                                                                                                                                                                                                                                                                                                                                                                                                      |       |
| 24 |                              |                                                                                                                                                                                                                                                                                                                                                                                                                                                                                                                                                                                                                                      |       |
| 25 |                              |                                                                                                                                                                                                                                                                                                                                                                                                                                                                                                                                                                                                                                      |       |
| 26 |                              |                                                                                                                                                                                                                                                                                                                                                                                                                                                                                                                                                                                                                                      |       |
| 27 |                              |                                                                                                                                                                                                                                                                                                                                                                                                                                                                                                                                                                                                                                      |       |
| 28 |                              |                                                                                                                                                                                                                                                                                                                                                                                                                                                                                                                                                                                                                                      |       |
| 29 |                              |                                                                                                                                                                                                                                                                                                                                                                                                                                                                                                                                                                                                                                      |       |
| 30 | Context                      | <a href="#">#7</a>                                                                                                                                                                                                                                                                                                                                                                                                                                                                                                                                                                                                                   |       |
| 31 |                              | Setting / site and salient contextual factors; rationale                                                                                                                                                                                                                                                                                                                                                                                                                                                                                                                                                                             |       |
| 32 |                              |                                                                                                                                                                                                                                                                                                                                                                                                                                                                                                                                                                                                                                      |       |
| 33 | Sampling strategy            | <a href="#">#8</a>                                                                                                                                                                                                                                                                                                                                                                                                                                                                                                                                                                                                                   | 4     |
| 34 |                              | How and why research participants, documents, or events were selected; criteria for deciding when no further sampling was necessary (e.g. sampling saturation); rationale                                                                                                                                                                                                                                                                                                                                                                                                                                                            |       |
| 35 |                              |                                                                                                                                                                                                                                                                                                                                                                                                                                                                                                                                                                                                                                      |       |
| 36 |                              |                                                                                                                                                                                                                                                                                                                                                                                                                                                                                                                                                                                                                                      |       |
| 37 |                              |                                                                                                                                                                                                                                                                                                                                                                                                                                                                                                                                                                                                                                      |       |
| 38 | Ethical issues pertaining to | <a href="#">#9</a>                                                                                                                                                                                                                                                                                                                                                                                                                                                                                                                                                                                                                   | 4     |
| 39 | human subjects               | Documentation of approval by an appropriate ethics review board and participant consent, or explanation for lack thereof; other confidentiality and data security issues                                                                                                                                                                                                                                                                                                                                                                                                                                                             |       |
| 40 |                              |                                                                                                                                                                                                                                                                                                                                                                                                                                                                                                                                                                                                                                      |       |
| 41 |                              |                                                                                                                                                                                                                                                                                                                                                                                                                                                                                                                                                                                                                                      |       |
| 42 |                              |                                                                                                                                                                                                                                                                                                                                                                                                                                                                                                                                                                                                                                      |       |
| 43 | Data collection methods      | <a href="#">#10</a>                                                                                                                                                                                                                                                                                                                                                                                                                                                                                                                                                                                                                  | 4 / 5 |
| 44 |                              | Types of data collected; details of data collection procedures including (as appropriate) start and stop dates of data collection and analysis, iterative process, triangulation of sources / methods, and modification of procedures in response to evolving study findings; rationale                                                                                                                                                                                                                                                                                                                                              |       |
| 45 |                              |                                                                                                                                                                                                                                                                                                                                                                                                                                                                                                                                                                                                                                      |       |
| 46 |                              |                                                                                                                                                                                                                                                                                                                                                                                                                                                                                                                                                                                                                                      |       |
| 47 |                              |                                                                                                                                                                                                                                                                                                                                                                                                                                                                                                                                                                                                                                      |       |
| 48 |                              |                                                                                                                                                                                                                                                                                                                                                                                                                                                                                                                                                                                                                                      |       |
| 49 |                              |                                                                                                                                                                                                                                                                                                                                                                                                                                                                                                                                                                                                                                      |       |
| 50 |                              |                                                                                                                                                                                                                                                                                                                                                                                                                                                                                                                                                                                                                                      |       |
| 51 | Data collection instruments  | <a href="#">#11</a>                                                                                                                                                                                                                                                                                                                                                                                                                                                                                                                                                                                                                  | 4/5   |
| 52 | and technologies             | Description of instruments (e.g. interview guides, questionnaires) and devices (e.g. audio recorders) used for data collection; if / how the instruments(s) changed over the course of the study                                                                                                                                                                                                                                                                                                                                                                                                                                     |       |
| 53 |                              |                                                                                                                                                                                                                                                                                                                                                                                                                                                                                                                                                                                                                                      |       |
| 54 |                              |                                                                                                                                                                                                                                                                                                                                                                                                                                                                                                                                                                                                                                      |       |
| 55 |                              |                                                                                                                                                                                                                                                                                                                                                                                                                                                                                                                                                                                                                                      |       |
| 56 |                              |                                                                                                                                                                                                                                                                                                                                                                                                                                                                                                                                                                                                                                      |       |
| 57 |                              |                                                                                                                                                                                                                                                                                                                                                                                                                                                                                                                                                                                                                                      |       |
| 58 |                              |                                                                                                                                                                                                                                                                                                                                                                                                                                                                                                                                                                                                                                      |       |
| 59 |                              |                                                                                                                                                                                                                                                                                                                                                                                                                                                                                                                                                                                                                                      |       |
| 60 |                              |                                                                                                                                                                                                                                                                                                                                                                                                                                                                                                                                                                                                                                      |       |

|    |                                                                                              |                     |                                                                                                                                                                                                                                                                                                          |     |
|----|----------------------------------------------------------------------------------------------|---------------------|----------------------------------------------------------------------------------------------------------------------------------------------------------------------------------------------------------------------------------------------------------------------------------------------------------|-----|
| 1  | Units of study                                                                               | <a href="#">#12</a> | Number and relevant characteristics of participants, documents, or events included in the study; level of participation (could be reported in results)                                                                                                                                                   | 4   |
| 2  |                                                                                              |                     |                                                                                                                                                                                                                                                                                                          |     |
| 3  |                                                                                              |                     |                                                                                                                                                                                                                                                                                                          |     |
| 4  |                                                                                              |                     |                                                                                                                                                                                                                                                                                                          |     |
| 5  |                                                                                              |                     |                                                                                                                                                                                                                                                                                                          |     |
| 6  | Data processing                                                                              | <a href="#">#13</a> | Methods for processing data prior to and during analysis, including transcription, data entry, data management and security, verification of data integrity, data coding, and anonymisation / deidentification of excerpts                                                                               | 4/5 |
| 7  |                                                                                              |                     |                                                                                                                                                                                                                                                                                                          |     |
| 8  |                                                                                              |                     |                                                                                                                                                                                                                                                                                                          |     |
| 9  |                                                                                              |                     |                                                                                                                                                                                                                                                                                                          |     |
| 10 |                                                                                              |                     |                                                                                                                                                                                                                                                                                                          |     |
| 11 |                                                                                              |                     |                                                                                                                                                                                                                                                                                                          |     |
| 12 |                                                                                              |                     |                                                                                                                                                                                                                                                                                                          |     |
| 13 | Data analysis                                                                                | <a href="#">#14</a> | Process by which inferences, themes, etc. were identified and developed, including the researchers involved in data analysis; usually references a specific paradigm or approach; rationale                                                                                                              | 4/5 |
| 14 |                                                                                              |                     |                                                                                                                                                                                                                                                                                                          |     |
| 15 |                                                                                              |                     |                                                                                                                                                                                                                                                                                                          |     |
| 16 |                                                                                              |                     |                                                                                                                                                                                                                                                                                                          |     |
| 17 |                                                                                              |                     |                                                                                                                                                                                                                                                                                                          |     |
| 18 | Techniques to enhance trustworthiness                                                        | <a href="#">#15</a> | Techniques to enhance trustworthiness and credibility of data analysis (e.g. member checking, audit trail, triangulation); rationale                                                                                                                                                                     | 4/5 |
| 19 |                                                                                              |                     |                                                                                                                                                                                                                                                                                                          |     |
| 20 |                                                                                              |                     |                                                                                                                                                                                                                                                                                                          |     |
| 21 |                                                                                              |                     |                                                                                                                                                                                                                                                                                                          |     |
| 22 |                                                                                              |                     |                                                                                                                                                                                                                                                                                                          |     |
| 23 |                                                                                              |                     |                                                                                                                                                                                                                                                                                                          |     |
| 24 | <b>Results/findings</b>                                                                      |                     |                                                                                                                                                                                                                                                                                                          |     |
| 25 |                                                                                              |                     |                                                                                                                                                                                                                                                                                                          |     |
| 26 | Syntheses and interpretation                                                                 | <a href="#">#16</a> | Main findings (e.g. interpretations, inferences, and themes); might include development of a theory or model, or integration with prior research or theory                                                                                                                                               | 6   |
| 27 |                                                                                              |                     |                                                                                                                                                                                                                                                                                                          |     |
| 28 |                                                                                              |                     |                                                                                                                                                                                                                                                                                                          |     |
| 29 |                                                                                              |                     |                                                                                                                                                                                                                                                                                                          |     |
| 30 |                                                                                              |                     |                                                                                                                                                                                                                                                                                                          |     |
| 31 | Links to empirical data                                                                      | <a href="#">#17</a> | Evidence (e.g. quotes, field notes, text excerpts, photographs) to substantiate analytic findings                                                                                                                                                                                                        | 6   |
| 32 |                                                                                              |                     |                                                                                                                                                                                                                                                                                                          |     |
| 33 |                                                                                              |                     |                                                                                                                                                                                                                                                                                                          |     |
| 34 |                                                                                              |                     |                                                                                                                                                                                                                                                                                                          |     |
| 35 | <b>Discussion</b>                                                                            |                     |                                                                                                                                                                                                                                                                                                          | 7   |
| 36 |                                                                                              |                     |                                                                                                                                                                                                                                                                                                          |     |
| 37 |                                                                                              |                     |                                                                                                                                                                                                                                                                                                          |     |
| 38 | Intergration with prior work, implications, transferability and contribution(s) to the field | <a href="#">#18</a> | Short summary of main findings; explanation of how findings and conclusions connect to, support, elaborate on, or challenge conclusions of earlier scholarship; discussion of scope of application / generalizability; identification of unique contributions(s) to scholarship in a discipline or field |     |
| 39 |                                                                                              |                     |                                                                                                                                                                                                                                                                                                          |     |
| 40 |                                                                                              |                     |                                                                                                                                                                                                                                                                                                          |     |
| 41 |                                                                                              |                     |                                                                                                                                                                                                                                                                                                          |     |
| 42 |                                                                                              |                     |                                                                                                                                                                                                                                                                                                          |     |
| 43 |                                                                                              |                     |                                                                                                                                                                                                                                                                                                          |     |
| 44 |                                                                                              |                     |                                                                                                                                                                                                                                                                                                          |     |
| 45 |                                                                                              |                     |                                                                                                                                                                                                                                                                                                          |     |
| 46 | Limitations                                                                                  | <a href="#">#19</a> | Trustworthiness and limitations of findings                                                                                                                                                                                                                                                              | 7   |
| 47 |                                                                                              |                     |                                                                                                                                                                                                                                                                                                          |     |
| 48 | <b>Other</b>                                                                                 |                     |                                                                                                                                                                                                                                                                                                          |     |
| 49 |                                                                                              |                     |                                                                                                                                                                                                                                                                                                          |     |
| 50 | Conflicts of interest                                                                        | <a href="#">#20</a> | Potential sources of influence of perceived influence on study conduct and conclusions; how these were managed                                                                                                                                                                                           | 7/8 |
| 51 |                                                                                              |                     |                                                                                                                                                                                                                                                                                                          |     |
| 52 |                                                                                              |                     |                                                                                                                                                                                                                                                                                                          |     |
| 53 |                                                                                              |                     |                                                                                                                                                                                                                                                                                                          |     |
| 54 | Funding                                                                                      | <a href="#">#21</a> | Sources of funding and other support; role of funders in data collection, interpretation and reporting                                                                                                                                                                                                   | 1   |
| 55 |                                                                                              |                     |                                                                                                                                                                                                                                                                                                          |     |
| 56 |                                                                                              |                     |                                                                                                                                                                                                                                                                                                          |     |
| 57 |                                                                                              |                     |                                                                                                                                                                                                                                                                                                          |     |
| 58 |                                                                                              |                     |                                                                                                                                                                                                                                                                                                          |     |
| 59 |                                                                                              |                     |                                                                                                                                                                                                                                                                                                          |     |
| 60 |                                                                                              |                     |                                                                                                                                                                                                                                                                                                          |     |

1 None The SRQR checklist is distributed with permission of Wolters Kluwer © 2014 by the Association of  
2 American Medical Colleges. This checklist can be completed online using <https://www.goodreports.org/>, a tool  
3 made by the [EQUATOR Network](#) in collaboration with [Penelope.ai](#)  
4  
5  
6  
7  
8  
9  
10  
11  
12  
13  
14  
15  
16  
17  
18  
19  
20  
21  
22  
23  
24  
25  
26  
27  
28  
29  
30  
31  
32  
33  
34  
35  
36  
37  
38  
39  
40  
41  
42  
43  
44  
45  
46  
47  
48  
49  
50  
51  
52  
53  
54  
55  
56  
57  
58  
59  
60

For peer review only

# BMJ Open

## Internal consistency and factor structure of Jenkins Sleep Scale – cross-sectional cohort study amongst 80,000 adults

|                                 |                                                                                                                                                                                                                                                                                                                                                                                                                                                                                                                                                                                                                                                                                                                                                 |
|---------------------------------|-------------------------------------------------------------------------------------------------------------------------------------------------------------------------------------------------------------------------------------------------------------------------------------------------------------------------------------------------------------------------------------------------------------------------------------------------------------------------------------------------------------------------------------------------------------------------------------------------------------------------------------------------------------------------------------------------------------------------------------------------|
| Journal:                        | <i>BMJ Open</i>                                                                                                                                                                                                                                                                                                                                                                                                                                                                                                                                                                                                                                                                                                                                 |
| Manuscript ID                   | bmjopen-2020-043276.R1                                                                                                                                                                                                                                                                                                                                                                                                                                                                                                                                                                                                                                                                                                                          |
| Article Type:                   | Original research                                                                                                                                                                                                                                                                                                                                                                                                                                                                                                                                                                                                                                                                                                                               |
| Date Submitted by the Author:   | 17-Nov-2020                                                                                                                                                                                                                                                                                                                                                                                                                                                                                                                                                                                                                                                                                                                                     |
| Complete List of Authors:       | Juhola, Juhani; TYKS Turku University Hospital, Physical and Rehabilitation medicine<br>Arokoski, J. P. A.; Helsinki University Central Hospital, Department of Physical and rehabilitation medicine<br>Ervasti, Jenni; Finnish Institute of Occupational Health, Topeliuksenkatu 41 a A, FI-00250, Helsinki, Finland,<br>Kivimäki, Mika; University of Helsinki Faculty of Medicine, ; University College London, Dep. of Epidemiology and Public Health<br>Vahtera, Jussi; Turun Yliopisto, Dep Public Health; Finnish Institute of Occupational Health,<br>Myllyntausta, Saana; University of Turku,<br>Saltychev, M; Turku University Hospital and University of Turku, Turku, Finland , Department of Physical and Rehabilitation Medicine |
| <b>Primary Subject Heading</b>: | Epidemiology                                                                                                                                                                                                                                                                                                                                                                                                                                                                                                                                                                                                                                                                                                                                    |
| Secondary Subject Heading:      | Research methods                                                                                                                                                                                                                                                                                                                                                                                                                                                                                                                                                                                                                                                                                                                                |
| Keywords:                       | SLEEP MEDICINE, EPIDEMIOLOGY, PUBLIC HEALTH                                                                                                                                                                                                                                                                                                                                                                                                                                                                                                                                                                                                                                                                                                     |
|                                 |                                                                                                                                                                                                                                                                                                                                                                                                                                                                                                                                                                                                                                                                                                                                                 |

SCHOLARONE™  
Manuscripts



I, the Submitting Author has the right to grant and does grant on behalf of all authors of the Work (as defined in the below author licence), an exclusive licence and/or a non-exclusive licence for contributions from authors who are: i) UK Crown employees; ii) where BMJ has agreed a CC-BY licence shall apply, and/or iii) in accordance with the terms applicable for US Federal Government officers or employees acting as part of their official duties; on a worldwide, perpetual, irrevocable, royalty-free basis to BMJ Publishing Group Ltd ("BMJ") its licensees and where the relevant Journal is co-owned by BMJ to the co-owners of the Journal, to publish the Work in this journal and any other BMJ products and to exploit all rights, as set out in our [licence](#).

The Submitting Author accepts and understands that any supply made under these terms is made by BMJ to the Submitting Author unless you are acting as an employee on behalf of your employer or a postgraduate student of an affiliated institution which is paying any applicable article publishing charge ("APC") for Open Access articles. Where the Submitting Author wishes to make the Work available on an Open Access basis (and intends to pay the relevant APC), the terms of reuse of such Open Access shall be governed by a Creative Commons licence – details of these licences and which [Creative Commons](#) licence will apply to this Work are set out in our licence referred to above.

Other than as permitted in any relevant BMJ Author's Self Archiving Policies, I confirm this Work has not been accepted for publication elsewhere, is not being considered for publication elsewhere and does not duplicate material already published. I confirm all authors consent to publication of this Work and authorise the granting of this licence.



1  
2  
3 **Internal consistency and factor structure of Jenkins Sleep Scale – cross-sectional cohort study amongst**  
4 **80,000 adults**  
5

6 *Running head:* Psychometric properties of Jenkins Sleep Scale  
7

8 Juhani Juhola MD<sup>1</sup>, Jari Arokoski MD, PhD<sup>2</sup>, Jenni Ervasti<sup>3</sup>, Mika Kivimäki PhD<sup>3,4,5</sup>, Jussi Vahtera PhD, MD<sup>6</sup>,  
9 Saana Myllyntausta<sup>6,7</sup>, Mikhail Saltychev MD, PhD<sup>1</sup>  
10

11  
12 <sup>1</sup> Department of Physical and Rehabilitation Medicine, Turku University Hospital and University of Turku,  
13 Turku, Finland  
14

15  
16 <sup>2</sup> Department of Physical and Rehabilitation Medicine, Helsinki University Hospital and University of  
17 Helsinki, Helsinki, Finland  
18

19  
20 <sup>3</sup> Finnish Institute of Occupational Health, Helsinki, Finland  
21

22 <sup>4</sup> Clinicum, Faculty of Medicine, University of Helsinki, Helsinki, Finland  
23

24 <sup>5</sup> Department of Epidemiology and Public Health, University College London Medical School, London,  
25 United Kingdom  
26

27  
28 <sup>6</sup> Department of Public Health, University of Turku and Turku University Hospital, Turku, Finland  
29

30 <sup>7</sup> School of Educational Sciences and Psychology, Psychology, University of Eastern Finland, Joensuu,  
31 Finland  
32

33  
34 *Address for correspondence:*  
35

36 Juhani Juhola, Department of Physical and Rehabilitation Medicine, Turku University Hospital, PO Box 52,  
37 FI-20521, Turku, Finland  
38

39  
40 E-mail: [juhani.juhola@turku.fi](mailto:juhani.juhola@turku.fi), Tel.: +358 50 527 57 56, Fax: +358 2 313 3730  
41

42  
43 *Keywords:* sleep disorder, psychometrics, validity  
44  
45  
46  
47  
48  
49  
50  
51  
52  
53  
54  
55  
56  
57  
58  
59  
60

## ABSTRACT

### Objectives

To assess the internal consistency and construct validity of the Finnish translation of the Jenkins Sleep Scale (JSS) in a large healthy working-age population with diverse work characteristics.

### Design

Survey-based cross-sectional cohort study.

### Setting

Survey conducted by an institute of occupational health.

### Participants

Employees of 10 towns and 6 hospital districts.

### Primary and secondary outcome measures

The internal consistency defined by a Cronbach's alpha. Exploratory and confirmatory factor analyses to evaluate the construct structure of the JSS.

### Results

Of 81,136 respondents, 14,890 (18%) were men and 66,246 (82%) were women. Their average age was 52.1 (13.2) years. Of the respondents, 41,823 (52%) were sleeping seven or less hours per night. The mean JSS total score was 6.4 (4.8) points. The JSS demonstrated high internal consistency with an alpha of 0.80 (lower 95% CL 0.80). Exploratory factor analysis supported a one-factor solution with eigenvalue of 1.94. Confirmatory factor analysis showed that all four items were positively correlated with a single common factor explaining 44% to 61% of common factor's variance.

### Conclusions

The Finnish translation of Jenkins Sleep Scale was found to be a unidimensional scale with good internal consistency. As such, the scale may be recommended as a practicable questionnaire when studying sleep difficulties in a healthy working-age population.

### Strengths and limitations of this study

To our knowledge, this was the first study on the psychometrics of the Finnish translation of the JSS.

1  
2 The cohort of over 80,000 respondents represented a wide spectrum of occupations from managers to  
3 manual workers.  
4

5  
6 Inequality in gender distribution may overestimate the prevalence of sleep difficulties in the studied  
7 cohort.  
8  
9

10 The JSS may be recommended as an easy-to-do questionnaire instrument for the studying of sleep  
11 difficulties in a healthy working-age population.  
12  
13

#### 14 **Contributorship statement**

15  
16 All the authors (JJ, SM, JA, JE, MS, MK and JV) substantially contributed to the conception and design of  
17 the work, drafting the work and revised it critically for important intellectual content, interpreted the  
18 data, and finally approved the version published. All the authors achieved an agreement to be accountable  
19 for all aspects of the work in ensuring that questions related to the accuracy or integrity of any part of the  
20 work are appropriately investigated and resolved. JJ was responsible for preparing the first draft. MS was  
21 responsible for the main data analysis. JV and MK were responsible for the acquisition of data. JV was a  
22 guarantor.  
23  
24  
25  
26  
27  
28  
29

#### 30 **Competing interests**

31  
32 The authors do not have any associations with commercial entities that provided support for the work  
33 reported in the submitted manuscript. The authors do not have any associations with commercial entities  
34 that could be viewed as having an interest in the general area of the submitted manuscript. The authors  
35 do not have any similar financial associations involving their spouse or their children under 18 years of  
36 age. The authors do not have any non-financial associations that may be relevant to the submitted  
37 manuscript.  
38  
39  
40  
41  
42  
43

#### 44 **Funding**

45  
46 This study was supported by funding granted by the Juho Vainio Foundation, Finland (to TL); the Academy  
47 of Finland (Grants 286294, 294154 and 319246 to SS; 633666 to MK; 309526 to TL); the Finnish Ministry  
48 of Education and Culture (to SS); NordForsk (to MK and JV); the UK MRC (Grant K013351 to MK) and The  
49 Finnish Environment Fund (Grants 190172 and 118060 to SM)  
50  
51  
52  
53

#### 54 **Data sharing statement**

55  
56 The data generated by this research that supports the article will be made available through a request to  
57 a corresponding author forwarding the request to JE, who manages the data of the survey, upon  
58 publication of the article. Only anonymized questionnaire data is available to share.  
59  
60

## INTRODUCTION

Several different questionnaires have been developed to assess the severity of sleep problems<sup>1</sup>. The Jenkins Sleep Scale (JSS), developed as a brief and standardized test for sleep disturbances in 1988, has been one of the most commonly used questionnaires in epidemiological studies<sup>1-4</sup>. Comparing to other similar measures, the JSS is a short questionnaire focusing on roughly recognizing sleep difficulties. That is unlike to more complex scales, like Insomnia Severity Index, which quantify also the impact of sleep disturbance on the level of daily functioning. The JSS has been translated in several languages<sup>5-10</sup> and found to be valid and reliable amongst patients with different health problems including rheumatoid arthritis<sup>10</sup>, psoriatic arthritis<sup>9</sup>, ankylosing spondylitis<sup>7</sup>, fibromyalgia<sup>5,11</sup>, chest pain<sup>12</sup>, post cardiac surgery patients<sup>2</sup>, patients with cognitive disorders<sup>13</sup> and epilepsy<sup>14</sup>. However, only a few studies have evaluated the psychometric properties of the JSS in large non-clinical populations<sup>2,3,8,15,16</sup>.

Previous studies have found the JSS to be internally consistent amongst patients with fibromyalgia<sup>5,11</sup>, rheumatoid arthritis<sup>10</sup>, ankylosing spondylitis<sup>7</sup> and psoriatic arthritis<sup>9</sup> as indicated by Cronbach's alphas between 0.7 and 0.9. Several studies has assessed the internal consistency of the JSS in general and/or healthy populations similarly reporting good to excellent Cronbach's alpha that vary between 0.8 and 0.9<sup>2,3,6,8,15,16</sup>. Only three previous studies have assessed the factor structure of the JSS finding the JSS to be a unidimensional scale<sup>3,6,8</sup>. The construct structure of the JSS analysis has been assessed by a single study using a confirmatory factor that produced strong correlations with common factor for all four items<sup>3</sup>. Like any brief screening instrument, the JSS has shortcomings, specifically the inability to address the spectrum of sleep difficulties. Hence it can only be used as a preliminary screener of sleep disturbance<sup>17</sup>.

Overall, there is uncertainty concerning the psychometric behavior of the JSS especially regarding its factor structure in healthy and/or general populations. Concerning a general population, previous research mostly focused on the internal consistency of JSS and its reliability. Instead, other important points, like e.g. factors structure, remained practically unknown. Additionally, the psychometric properties of Finnish translation of the JSS have not been studied yet. To address this limitation, the aim of this study was to assess the internal consistency and construct validity of the Finnish translation of the JSS in a large healthy working-age population.

## METHODS

The data were derived from the Finnish Public Sector (FPS) study, an on-going prospective cohort study of employees in the municipal services of 10 Finnish towns and 21 public hospitals. The eligible population from the register cohort of FPS (n=151 618) included those who had been employed for a minimum of 6 months at the participating organisations between 1991 and 2005. Employers' records have been used to identify the eligible employees for a nested survey cohort to whom questionnaire surveys have been repeated every 4 years since 2000<sup>18</sup>. For this study, the data were sourced from the survey in 2016 – 2017 administered to the FPS sub-cohorts (average response rate 70%). Individual-level survey data cannot be made publicly available, but information on the data and analyses are available upon request to the corresponding author. The ethics committee of the Hospital District of Helsinki and Uusimaa has approved the study.

Age was defined in full years at the time of survey response. Body mass index (BMI) was defined as weight in kg/height in m<sup>2</sup>. The level of physical activity was calculated from the survey responses and converted into metabolic equivalent of task (MET) . Alcohol consumption was obtained from the survey and converted into g/week. The respondents were asked about their usual amount of sleep hours per 24 hours with the following nine response alternatives: ≤6 hours, 6.5 hours, 7 hours, 7.5 hours, 8 hours, 8.5 hours, 9 hours, 9.5 hours, and ≥10 hours.

Jenkins Sleep Scale (JSS) is a four-item questionnaire to follow common sleep problems<sup>2</sup>. The frequency of sleep problems in the last month is evaluated using four items: the difficulty to fall asleep, wake up at night, difficulty to stay asleep, and nonrestorative sleep (i.e. waking up after the usual amount of sleep feeling tired and worn out). Each item is rated on a Likert-like scale from zero to five, where zero is “never”, 1 is “1- 3 days”, 2 is “about 1 night/week”, 3 is “2-4 nights/week”, 4 is “5-6 nights/week” and 5 is “almost every night”. The total score is a simple sum of all four items' scores and ranges from zero (no sleep problems) to 20 (most sleep problems). The score of 11 is a cut-off – a score <12 is defined as little of sleep disturbances and a score >11 is understood as high frequency of sleep disturbances<sup>19</sup>. Another way to dichotomize the JSS is considering sleep difficulties being present if there is at least one “yes” response (>15 nights in the previous 4 weeks) to any item.

### *Patient and public involvement*

Participants of research were not involved in setting the study question and outcome measures and were not involved in the design and implementation of the study or writing the manuscript.

### **Statistical analysis**

#### *Internal consistency and exploratory factor analysis*

1  
2 The internal consistency was defined by a Cronbach's alpha reported along with its one-sided (lower) 95%  
3 confidence limit (95% CL). The  $\alpha \geq 0.9$  was considered excellent,  $\geq 0.8$  good,  $\geq 0.7$  acceptable,  $\geq 0.6$   
4 questionable,  $\geq 0.5$  poor, and  $< 0.5$  was considered unacceptable<sup>20</sup>. Exploratory factor analysis (EFA) was  
5 used to approximate the construct structure of the JSS. The goal was to determine whether the JSS  
6 measures only one latent trait (= sleep disturbances) or if there are other possible significant latent  
7 variables affecting the results. The results were analyzed both numerically and graphically. Exploratory  
8 factor analysis (principal factors) was applied with a minimum eigenvalue for retention set at  $> 1.0$  (Kaiser's  
9 rule). The varimax rotation was applied. Retained and excluded factors were also explored visually on a  
10 scree plot along with the parallel analysis.  
11  
12  
13  
14  
15  
16

### 17 *Confirmatory factor analysis*

18  
19  
20 The estimation procedure used the maximum likelihood method considering covariances supplied as  
21 input being unbiased. For simplicity, the estimates were reported in standardized form as correlation  
22 coefficients. A correlation  $< 0.2$  was considered poor, from 0.21 to 0.4 fair, from 0.41 to 0.6 moderate,  
23 from 0.61 to 0.8 substantial, and  $> 0.8$  perfect<sup>21</sup>. In addition, the coefficients of determination were  
24 calculated to show the proportion of variance in common "sleep disturbances" construct that can be  
25 explained by the items. Finally, the coefficient of determination for the entire model was calculated.  
26  
27  
28  
29

30  
31 In order to assess how well the model matches the observed data, the root mean square error of  
32 approximation (RMSEA) was used as a primary index. First, the model fit was tested assuming there were  
33 no covariances between unique factors. After that, the modification indices suggested by the software  
34 were used to add covariance between factors (double-headed arrows in Figure 1) one at a time, each time  
35 testing the RMSEA closeness to the value of  $< 0.05$ , or, at least,  $< 0.08$  – the threshold for accepting the  
36 model fit. Every insertion was considered plausible if it made logical sense and did not violate the  
37 assumption that the common and the unique factors are uncorrelated. After achieving the RMSEA value  
38 of  $< 0.05$ , no further covariances were imputed. The goodness of fit was assessed using a chi-square test.  
39 Also, the Akaike's and Bayesian information criteria (AIC and BIC), comparative fit index (CFI) and the  
40 Tucker-Lewis index (TLI) were calculated. The AIC and BIC were considered good if they were close to 1.0.  
41  
42  
43  
44  
45  
46  
47  
48 The analyses were performed using Stata/IC Statistical Software: Release 16. College Station (StataCorp  
49 LP, TX, USA).  
50  
51  
52  
53  
54  
55  
56  
57  
58  
59  
60

## RESULTS

Of 81,136 respondents, 14,890 (18%) were men and 66,246 (82%) were women. Their mean age was 52.1 (standard deviation [SD] = 13.2) years, body mass index 26.2 (SD = 4.7) kg/m<sup>2</sup>, physical activity 29.4 (SD = 25.3) METs/week, and alcohol consumption 49.7 (SD = 90.9) g/week (equivalent to 5 units of alcohol per week). Of the respondents, 41,823 (52%) were sleeping seven or less hours per night. The mean JSS total score was 6.4 (4.8) points.

The JSS demonstrated a substantial internal consistency with alpha 0.80 (lower 95% CL 0.80). The exploratory factor analysis resulted in one retaining factor with eigenvalue of 1.94 based on Kaiser criterion (Table 1 and Figure 2). Three other factors had eigenvalues between -0.03 and -0.18 and thus explained variance less the observed variables. The parallel analysis of scree plot confirmed the unidimensional structure of JSS.

The confirmatory factor analysis showed that all four items positively correlated with a common factor explaining from 44% up to 61% of the variance of the common factor (Table 2 and Figure 1). The highest correlation 0.78 ( $r^2=0.61$ ) was observed for the third item "waking up and trouble falling asleep again". Other items demonstrated similar and slightly lower correlations between 0.66 and 0.67 ( $r^2=0.44$  to 0.45). The model obtained a good fit after adding one covariance between second and third items: 0.26 (95% confidence interval 0.25 to 0.28). After that, the RMSEA of the model was 0.03 (Table 3).

## DISCUSSION

In this large cohort study, the JSS was found to be an internally consistent scale. Exploratory factor analysis suggested the unidimensionality of the JSS. In addition, confirmatory factor analysis demonstrated a single-factor structure with only one mild aberration; the JSS item “waking up and trouble falling asleep again” seemed to show higher coefficient of determination than any of the other items.

The generalizability of the results might be weakened by the gender disbalance of the studied cohort (women were predominated). This disbalance was due to the fact that fewer men are involved in the studied areas of public sector. Also, the mean age of study participants was 52 years and, therefore, the results described, in the first instance, people in the last third of their working life span. While been widely used for over two decades, the Finnish translation of JSS had never undergone a full linguistic validation process which might affect its equivalency with an English version. The response rate was 70% and there was no analysis if the non-respondents’ demographic characteristics might affect the results.

To our knowledge, this was the first study on the psychometrics of the Finnish translation of the JSS. The cohort of over 80,000 respondents represented a wide spectrum of occupations from managers to manual workers. However, the generalizability of the results might be compromised by the following aspects. The studied cohort was predominated by women. It has previously been stated that sleep problems are more common among women meaning that this inequality in gender distribution may overestimate the prevalence of sleep difficulties in the studied cohort<sup>3</sup>. While overall working age could be understood as an age between early adulthood and the age of retirement, the mean age of the respondents was 52 years, covering mainly the last third of the working life span.

The results are in line with several previous studies that have found the JSS to be a unidimensional scale with excellent internal consistency<sup>3 6 8</sup>. The Cronbach’s alpha of 0.8 seen in the present study was close to the estimates reported by previous research in both general population and populations of people with different health conditions<sup>2 3 5-11 15 16</sup>. While the JSS has been studied by employing alpha and exploratory factor analysis by several studies, a confirmatory factor analysis has previously been used by only a single study (Tibubos et al. 2020). The correlations of four items with a common factor seen in study by Tibubos et al. resembled the estimates observed in the present study with one exception. The present results demonstrated the greatest correlation for the item “waking up and trouble falling asleep again”, being in line with Tibubos et al., but, contrary to our result, item “waking up feeling tired” had the smallest (out of four) estimate in their study. This difference might be explained by differences in the studied cohorts e.g. in gender distribution and work status. Indeed, the present study represents a population that is probably healthier than general population. In addition, it is possible, though unlikely, that some differences might have occurred due to the linguistic variability between the two translations.



1  
2 Further research may reveal more details on the JSS psychometrics, for example, its properties based on  
3 an item response theory analysis. Especially confirmatory factor analysis may be recommended for future  
4 research, as the knowledge on the JSS factor structure is still scarce.  
5  
6

### 7 **Conclusions**

8  
9 The JSS was found to be a unidimensional scale with good internal consistency. As such, the JSS may be  
10 recommended as an easy-to-do questionnaire instrument for the studying of sleep difficulties in a healthy  
11 working-age population.  
12  
13  
14  
15  
16  
17  
18  
19  
20  
21  
22  
23  
24  
25  
26  
27  
28  
29  
30  
31  
32  
33  
34  
35  
36  
37  
38  
39  
40  
41  
42  
43  
44  
45  
46  
47  
48  
49  
50  
51  
52  
53  
54  
55  
56  
57  
58  
59  
60

For peer review only

**TABLES AND FIGURES**

Table 1. Exploratory factor analysis of loadings of the Jenkins Sleep Scale items

| Jenkins Sleep Scale Items                     | Factor #1 | Uniqueness |
|-----------------------------------------------|-----------|------------|
| Trouble falling asleep                        | 0.62      | 0.61       |
| Waking up but no trouble falling asleep again | 0.72      | 0.48       |
| Waking up and trouble falling asleep again    | 0.79      | 0.37       |
| Waking up feeling tired                       | 0.63      | 0.60       |

For peer review only

Table 2. Confirmatory factor analysis of Jenkins Sleep Scale – correlation between observed and predicted estimates (r) along with coefficient of determination ( $r^2$ )

| Estimates                                     | Variance |           |          | r    | 95% CI |       | $r^2$ |
|-----------------------------------------------|----------|-----------|----------|------|--------|-------|-------|
|                                               | Fitted   | Predicted | Residual |      | Lower  | Upper |       |
| Trouble falling asleep                        | 1.63     | 0.71      | 0.92     | 0.66 | 0.66   | 0.67  | 0.44  |
| Waking up but no trouble falling asleep again | 2.83     | 1.29      | 1.55     | 0.67 | 0.67   | 0.68  | 0.45  |
| Waking up and trouble falling asleep again    | 2.40     | 1.47      | 0.92     | 0.78 | 0.78   | 0.79  | 0.61  |
| Waking up feeling tired                       | 2.28     | 1.02      | 1.26     | 0.67 | 0.66   | 0.68  | 0.45  |
| Overall                                       |          |           |          |      |        |       | 0.78  |

For peer review only

Table 3. Confirmatory factor analysis of Jenkins Sleep Scale– goodness of fit

| Fit statistic        | Value     | Description                              |
|----------------------|-----------|------------------------------------------|
| Likelihood ratio     |           |                                          |
| chi <sup>2</sup>     | 84.49     | model vs. saturated                      |
| p-value              | <0.01     |                                          |
| Population error     |           |                                          |
| RMSEA                | 0.03      | Root mean squared error of approximation |
| 90% CI, lower bound  | 0.03      |                                          |
| 90% CI, upper bound  | 0.04      |                                          |
| p-value              | 1.00      | Probability RMSEA ≤ 0.05                 |
| Information criteria |           |                                          |
| AIC                  | 1,036,000 | Akaike's information criterion           |
| BIC                  | 1,037,000 | Bayesian information criterion           |
| Baseline comparison  |           |                                          |
| CFI                  | 1.00      | Comparative fit index                    |
| TLI                  | 1.00      | Tucker-Lewis index                       |
| Size of residuals    |           |                                          |
| SRMR                 | 0.01      | Standardized root mean squared residual  |
| CD                   | 0.78      | Coefficient of determination             |

1  
2 Figure 1. Confirmatory factor analysis of Jenkins Sleep Scale.  
3

4  
5 “ $\epsilon$ ”-circles represent a measurement error associated with an observed variable (variance that is  
6  
7 predicted by the latent factor). Estimates placed between  $\epsilon$ -errors and observed variables represent the  
8  
9 amount of variance in higher level data that can be explained by a particular variable.  
10  
11

12 Figure 2. Exploratory factor analysis of Jenkins Sleep Scale – scree plot with parallel analysis.  
13  
14  
15  
16  
17  
18  
19  
20  
21  
22  
23  
24  
25  
26  
27  
28  
29  
30  
31  
32  
33  
34  
35  
36  
37  
38  
39  
40  
41  
42  
43  
44  
45  
46  
47  
48  
49  
50  
51  
52  
53  
54  
55  
56  
57  
58  
59  
60

For peer review only

1  
2  
3  
4  
5  
6  
7  
8  
9  
10  
11  
12  
13  
14  
15  
16  
17  
18  
19  
20  
21  
22  
23  
24  
25  
26  
27  
28  
29  
30  
31  
32  
33  
34  
35  
36  
37  
38  
39  
40  
41  
42  
43  
44  
45  
46  
47  
48  
49  
50  
51  
52  
53  
54  
55  
56  
57  
58  
59  
60  
**REFERENCES**

1. Lallukka T, Dregan A, Armstrong D. Comparison of a sleep item from the General Health Questionnaire-12 with the Jenkins Sleep Questionnaire as measures of sleep disturbance. *J Epidemiol* 2011;21(6):474-80. doi: 10.2188/jea.je20110023 [published Online First: 2011/10/12]
2. Jenkins CD, Stanton BA, Niemcryk SJ, et al. A scale for the estimation of sleep problems in clinical research. *J Clin Epidemiol* 1988;41(4):313-21. doi: 10.1016/0895-4356(88)90138-2 [published Online First: 1988/01/01]
3. Tibubos AN, Zenger M, Schmalbach B, et al. Measurement invariance, validation and normative data of the Jenkins Sleep Scale-4 (JSS-4) in the German general population across the life span. *J Psychosom Res* 2020;130:109933. doi: 10.1016/j.jpsychores.2020.109933 [published Online First: 2020/01/18]
4. Vahtera J, Pentti J, Helenius H, et al. Sleep disturbances as a predictor of long-term increase in sickness absence among employees after family death or illness. *Sleep* 2006;29(5):673-82. doi: 10.1093/sleep/29.5.673 [published Online First: 2006/06/16]
5. Unal-Ulutatar C, Ozsoy-Unubol T. Psychometric properties of Turkish version of Jenkins sleep scale in fibromyalgia syndrome. *Adv Rheumatol* 2020;60(1):22. doi: 10.1186/s42358-020-0123-3 [published Online First: 2020/04/18]
6. Salman M, Khan AH, Sulaiman SAS, et al. Psychometric Validation of the Urdu Version of the Jenkins Sleep Evaluation Questionnaire. *Age (mean±SD)* 2018;21:0.84.
7. Duruoz MT, Ulutatar F, Ozturk EC, et al. Assessment of the validity and reliability of the Jenkins Sleep Scale in ankylosing spondylitis. *Int J Rheum Dis* 2019;22(2):275-79. doi: 10.1111/1756-185x.13447 [published Online First: 2018/12/20]
8. Reis C, Mestre C, Tecedeiro M, et al. Translation, cross-cultural adaptation and psychometric properties of the Jenkins Sleep Scale in a sample of Portuguese shift workers. *Laboratório de Psicologia* 2014;12(2):89-98.

- 1  
2 9. Duruöz MT, Erdem D, Gencer K, et al. Validity and reliability of the Turkish version of the Jenkins Sleep  
3  
4 Scale in psoriatic arthritis. *Rheumatol Int* 2018;38(2):261-65. doi: 10.1007/s00296-017-3911-2  
5  
6 [published Online First: 2017/12/19]  
7
- 8  
9 10. Duruöz MT, Ünal Ç, Ulutatar F, et al. The Validity and Reliability of Turkish Version of the Jenkins  
10  
11 Sleep Evaluation Scale in Rheumatoid Arthritis. *Arch Rheumatol* 2018;33(2):160-67. doi:  
12  
13 10.5606/ArchRheumatol.2018.6376 [published Online First: 2018/09/13]  
14
- 15  
16 11. Crawford BK, Piau EC, Lai C, et al. Assessing sleep in fibromyalgia: investigation of an alternative  
17  
18 scoring method for the Jenkins Sleep Scale based on data from randomized controlled studies.  
19  
20 *Clin Exp Rheumatol* 2010;28(6 Suppl 63):S100-9. [published Online First: 2011/02/18]  
21
- 22  
23 12. Jerlock M, Gaston-Johansson F, Kjellgren KI, et al. Coping strategies, stress, physical activity and  
24  
25 sleep in patients with unexplained chest pain. *BMC Nurs* 2006;5:7. doi: 10.1186/1472-6955-5-7  
26  
27 [published Online First: 2006/11/02]  
28
- 29  
30 13. Bharambe V, Larner AJ. Functional cognitive disorders: demographic and clinical features contribute  
31  
32 to a positive diagnosis. *Neurodegener Dis Manag* 2018;8(6):377-83. doi: 10.2217/nmt-2018-  
33  
34 0025 [published Online First: 2018/11/20]  
35
- 36  
37 14. Aji B, Elhadd K, Larner A. Cognitive Symptoms in Patients with Epilepsy: Role of Sleep and Mood  
38  
39 Disturbance. *Journal of Sleep Disorders & Therapy* 2019;8(1):1-4.  
40
- 41  
42 15. Nasermoaddeli A, Sekine M, Kumari M, et al. Association of sleep quality and free time leisure  
43  
44 activities in Japanese and British civil servants. *J Occup Health* 2005;47(5):384-90. doi:  
45  
46 10.1539/joh.47.384 [published Online First: 2005/10/19]  
47
- 48  
49 16. Ornat L, Martínez-Deearth R, Chedraui P, et al. Assessment of subjective sleep disturbance and  
50  
51 related factors during female mid-life with the Jenkins Sleep Scale. *Maturitas* 2014;77(4):344-50.  
52  
53 doi: 10.1016/j.maturitas.2014.01.005 [published Online First: 2014/02/18]  
54
- 55  
56 17. Shahid A, Wilkinson K, Marcu S, et al. Jenkins Sleep Scale. In: Shahid A, Wilkinson K, Marcu S, et al.,  
57  
58 eds. STOP, THAT and one hundred other sleep scales. New York: Springer 2011:203-04.  
59  
60

- 1  
2 18. Kivimäki M, Lawlor DA, Smith GD, et al. Socioeconomic position, co-occurrence of behavior-related  
3  
4 risk factors, and coronary heart disease: the Finnish Public Sector study. *American journal of*  
5  
6 *public health* 2007;97(5):874-79.  
7  
8  
9 19. Monterrosa-Castro Á, Portela-Buelvas K, Salgado-Madrid M, et al. Instruments to study sleep  
10  
11 disorders in climacteric women. *Sleep Science* 2016;9(3):169-78.  
12  
13 20. George D, Mallery P. SPSS for Windows step by step: A simple guide and reference. Boston: Allyn &  
14  
15 Bacon 2003.  
16  
17 21. Akoglu H. User's guide to correlation coefficients. *Turk J Emerg Med* 2018;18(3):91-93. doi:  
18  
19 10.1016/j.tjem.2018.08.001 [published Online First: 2018/09/08]  
20  
21  
22  
23  
24  
25  
26  
27  
28  
29  
30  
31  
32  
33  
34  
35  
36  
37  
38  
39  
40  
41  
42  
43  
44  
45  
46  
47  
48  
49  
50  
51  
52  
53  
54  
55  
56  
57  
58  
59  
60



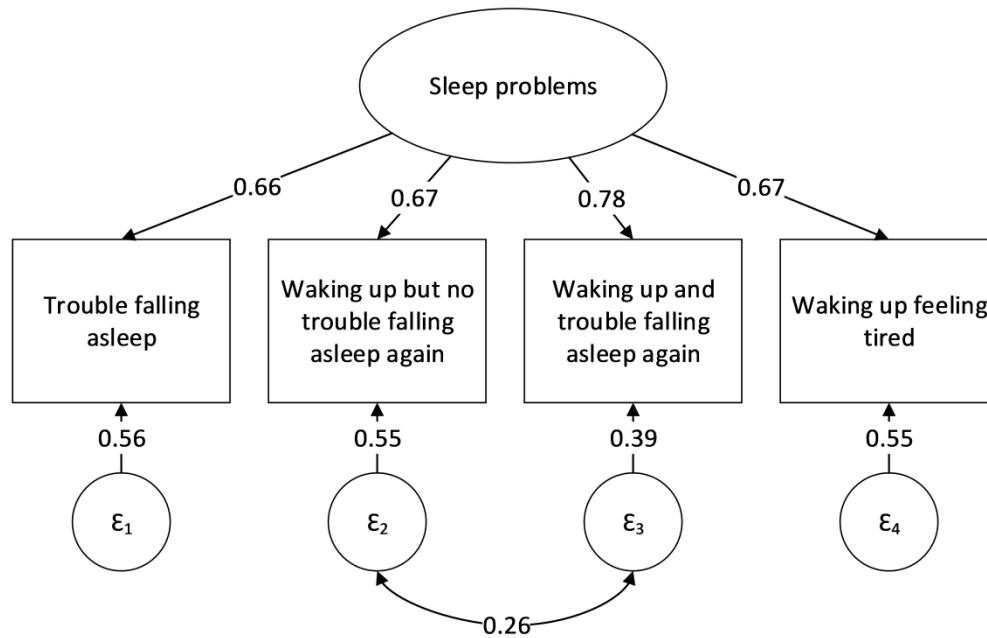

Figure 1. Confirmatory factor analysis of Jenkins Sleep Scale.  
 "ε"-circles represent a measurement error associated with an observed variable (variance that is predicted by the latent factor). Estimates placed between ε-errors and observed variables represent the amount of variance in higher level data that can be explained by a particular variable.

330x214mm (300 x 300 DPI)

1  
2  
3  
4  
5  
6  
7  
8  
9  
10  
11  
12  
13  
14  
15  
16  
17  
18  
19  
20  
21  
22  
23  
24  
25  
26  
27  
28  
29  
30  
31  
32  
33  
34  
35  
36  
37  
38  
39  
40  
41  
42  
43  
44  
45  
46  
47  
48  
49  
50  
51  
52  
53  
54  
55  
56  
57  
58  
59  
60

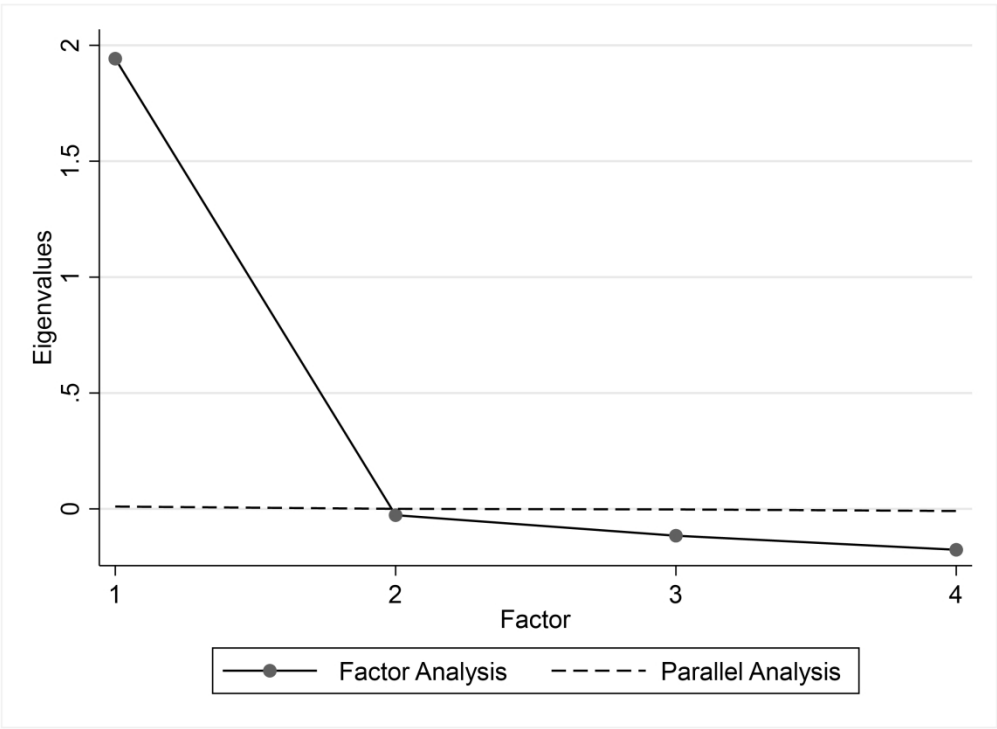

Figure 2. Exploratory factor analysis of Jenkins Sleep Scale – scree plot with parallel analysis.

233x169mm (300 x 300 DPI)

## STROBE Statement—checklist of items that should be included in reports of observational studies

|                              | Item No. | Recommendation                                                                                                                                                                                                                                                                                            | Page No. |
|------------------------------|----------|-----------------------------------------------------------------------------------------------------------------------------------------------------------------------------------------------------------------------------------------------------------------------------------------------------------|----------|
| <b>Title and abstract</b>    | 1        | (a) Indicate the study's design with a commonly used term in the title or the abstract                                                                                                                                                                                                                    | 1        |
|                              |          | (b) Provide in the abstract an informative and balanced summary of what was done and what was found                                                                                                                                                                                                       | 2        |
| <b>Introduction</b>          |          |                                                                                                                                                                                                                                                                                                           |          |
| Background/rationale         | 2        | Explain the scientific background and rationale for the investigation being reported                                                                                                                                                                                                                      | 4        |
| Objectives                   | 3        | State specific objectives, including any prespecified hypotheses                                                                                                                                                                                                                                          | 4        |
| <b>Methods</b>               |          |                                                                                                                                                                                                                                                                                                           |          |
| Study design                 | 4        | Present key elements of study design early in the paper                                                                                                                                                                                                                                                   | 5        |
| Setting                      | 5        | Describe the setting, locations, and relevant dates, including periods of recruitment, exposure, follow-up, and data collection                                                                                                                                                                           | 5        |
| Participants                 | 6        | (a) <i>Cohort study</i> —Give the eligibility criteria, and the sources and methods of selection of participants. Describe methods of follow-up                                                                                                                                                           | 5        |
|                              |          | <i>Case-control study</i> —Give the eligibility criteria, and the sources and methods of case ascertainment and control selection. Give the rationale for the choice of cases and controls                                                                                                                |          |
|                              |          | <i>Cross-sectional study</i> —Give the eligibility criteria, and the sources and methods of selection of participants                                                                                                                                                                                     |          |
|                              |          | (b) <i>Cohort study</i> —For matched studies, give matching criteria and number of exposed and unexposed<br><i>Case-control study</i> —For matched studies, give matching criteria and the number of controls per case                                                                                    |          |
| Variables                    | 7        | Clearly define all outcomes, exposures, predictors, potential confounders, and effect modifiers. Give diagnostic criteria, if applicable                                                                                                                                                                  | 5        |
| Data sources/<br>measurement | 8*       | For each variable of interest, give sources of data and details of methods of assessment (measurement). Describe comparability of assessment methods if there is more than one group                                                                                                                      | 5        |
| Bias                         | 9        | Describe any efforts to address potential sources of bias                                                                                                                                                                                                                                                 | 5        |
| Study size                   | 10       | Explain how the study size was arrived at                                                                                                                                                                                                                                                                 | 5        |
| Quantitative variables       | 11       | Explain how quantitative variables were handled in the analyses. If applicable, describe which groupings were chosen and why                                                                                                                                                                              | 5        |
| Statistical methods          | 12       | (a) Describe all statistical methods, including those used to control for confounding                                                                                                                                                                                                                     | 6        |
|                              |          | (b) Describe any methods used to examine subgroups and interactions                                                                                                                                                                                                                                       | 6        |
|                              |          | (c) Explain how missing data were addressed                                                                                                                                                                                                                                                               | 6        |
|                              |          | (d) <i>Cohort study</i> —If applicable, explain how loss to follow-up was addressed<br><i>Case-control study</i> —If applicable, explain how matching of cases and controls was addressed<br><i>Cross-sectional study</i> —If applicable, describe analytical methods taking account of sampling strategy | 6        |

|                          |     |                                                                                                                                                                                                              |     |
|--------------------------|-----|--------------------------------------------------------------------------------------------------------------------------------------------------------------------------------------------------------------|-----|
|                          |     | (e) Describe any sensitivity analyses                                                                                                                                                                        | 6   |
| <b>Results</b>           |     |                                                                                                                                                                                                              |     |
| Participants             | 13* | (a) Report numbers of individuals at each stage of study—eg numbers potentially eligible, examined for eligibility, confirmed eligible, included in the study, completing follow-up, and analysed            | 7   |
|                          |     | (b) Give reasons for non-participation at each stage                                                                                                                                                         | 7   |
|                          |     | (c) Consider use of a flow diagram                                                                                                                                                                           | 7   |
| Descriptive data         | 14* | (a) Give characteristics of study participants (eg demographic, clinical, social) and information on exposures and potential confounders                                                                     | 7   |
|                          |     | (b) Indicate number of participants with missing data for each variable of interest                                                                                                                          | 7   |
|                          |     | (c) <i>Cohort study</i> —Summarise follow-up time (eg, average and total amount)                                                                                                                             | 7   |
| Outcome data             | 15* | <i>Cohort study</i> —Report numbers of outcome events or summary measures over time                                                                                                                          | 7   |
|                          |     | <i>Case-control study</i> —Report numbers in each exposure category, or summary measures of exposure                                                                                                         | 7   |
|                          |     | <i>Cross-sectional study</i> —Report numbers of outcome events or summary measures                                                                                                                           | 7   |
| Main results             | 16  | (a) Give unadjusted estimates and, if applicable, confounder-adjusted estimates and their precision (eg, 95% confidence interval). Make clear which confounders were adjusted for and why they were included | 7   |
|                          |     | (b) Report category boundaries when continuous variables were categorized                                                                                                                                    | 7   |
|                          |     | (c) If relevant, consider translating estimates of relative risk into absolute risk for a meaningful time period                                                                                             | 7   |
| Other analyses           | 17  | Report other analyses done—eg analyses of subgroups and interactions, and sensitivity analyses                                                                                                               | 7   |
| <b>Discussion</b>        |     |                                                                                                                                                                                                              |     |
| Key results              | 18  | Summarise key results with reference to study objectives                                                                                                                                                     | 8   |
| Limitations              | 19  | Discuss limitations of the study, taking into account sources of potential bias or imprecision. Discuss both direction and magnitude of any potential bias                                                   | 8   |
| Interpretation           | 20  | Give a cautious overall interpretation of results considering objectives, limitations, multiplicity of analyses, results from similar studies, and other relevant evidence                                   | 8-9 |
| Generalisability         | 21  | Discuss the generalisability (external validity) of the study results                                                                                                                                        | 8-9 |
| <b>Other information</b> |     |                                                                                                                                                                                                              |     |
| Funding                  | 22  | Give the source of funding and the role of the funders for the present study and, if applicable, for the original study on which the present article is based                                                | 3   |

# BMJ Open

## Internal consistency and factor structure of Jenkins Sleep Scale – cross-sectional cohort study amongst 80,000 adults

|                                 |                                                                                                                                                                                                                                                                                                                                                                                                                                                                                                                                                                                                                                                                                                                                                 |
|---------------------------------|-------------------------------------------------------------------------------------------------------------------------------------------------------------------------------------------------------------------------------------------------------------------------------------------------------------------------------------------------------------------------------------------------------------------------------------------------------------------------------------------------------------------------------------------------------------------------------------------------------------------------------------------------------------------------------------------------------------------------------------------------|
| Journal:                        | <i>BMJ Open</i>                                                                                                                                                                                                                                                                                                                                                                                                                                                                                                                                                                                                                                                                                                                                 |
| Manuscript ID                   | bmjopen-2020-043276.R2                                                                                                                                                                                                                                                                                                                                                                                                                                                                                                                                                                                                                                                                                                                          |
| Article Type:                   | Original research                                                                                                                                                                                                                                                                                                                                                                                                                                                                                                                                                                                                                                                                                                                               |
| Date Submitted by the Author:   | 04-Dec-2020                                                                                                                                                                                                                                                                                                                                                                                                                                                                                                                                                                                                                                                                                                                                     |
| Complete List of Authors:       | Juhola, Juhani; TYKS Turku University Hospital, Physical and Rehabilitation medicine<br>Arokoski, J. P. A.; Helsinki University Central Hospital, Department of Physical and rehabilitation medicine<br>Ervasti, Jenni; Finnish Institute of Occupational Health, Topeliuksenkatu 41 a A, FI-00250, Helsinki, Finland,<br>Kivimäki, Mika; University of Helsinki Faculty of Medicine, ; University College London, Dep. of Epidemiology and Public Health<br>Vahtera, Jussi; Turun Yliopisto, Dep Public Health; Finnish Institute of Occupational Health,<br>Myllyntausta, Saana; University of Turku,<br>Saltychev, M; Turku University Hospital and University of Turku, Turku, Finland , Department of Physical and Rehabilitation Medicine |
| <b>Primary Subject Heading</b>: | Epidemiology                                                                                                                                                                                                                                                                                                                                                                                                                                                                                                                                                                                                                                                                                                                                    |
| Secondary Subject Heading:      | Research methods                                                                                                                                                                                                                                                                                                                                                                                                                                                                                                                                                                                                                                                                                                                                |
| Keywords:                       | SLEEP MEDICINE, EPIDEMIOLOGY, PUBLIC HEALTH                                                                                                                                                                                                                                                                                                                                                                                                                                                                                                                                                                                                                                                                                                     |
|                                 |                                                                                                                                                                                                                                                                                                                                                                                                                                                                                                                                                                                                                                                                                                                                                 |

SCHOLARONE™  
Manuscripts



I, the Submitting Author has the right to grant and does grant on behalf of all authors of the Work (as defined in the below author licence), an exclusive licence and/or a non-exclusive licence for contributions from authors who are: i) UK Crown employees; ii) where BMJ has agreed a CC-BY licence shall apply, and/or iii) in accordance with the terms applicable for US Federal Government officers or employees acting as part of their official duties; on a worldwide, perpetual, irrevocable, royalty-free basis to BMJ Publishing Group Ltd ("BMJ") its licensees and where the relevant Journal is co-owned by BMJ to the co-owners of the Journal, to publish the Work in this journal and any other BMJ products and to exploit all rights, as set out in our [licence](#).

The Submitting Author accepts and understands that any supply made under these terms is made by BMJ to the Submitting Author unless you are acting as an employee on behalf of your employer or a postgraduate student of an affiliated institution which is paying any applicable article publishing charge ("APC") for Open Access articles. Where the Submitting Author wishes to make the Work available on an Open Access basis (and intends to pay the relevant APC), the terms of reuse of such Open Access shall be governed by a Creative Commons licence – details of these licences and which [Creative Commons](#) licence will apply to this Work are set out in our licence referred to above.

Other than as permitted in any relevant BMJ Author's Self Archiving Policies, I confirm this Work has not been accepted for publication elsewhere, is not being considered for publication elsewhere and does not duplicate material already published. I confirm all authors consent to publication of this Work and authorise the granting of this licence.

1  
2  
3 **Internal consistency and factor structure of Jenkins Sleep Scale – cross-sectional cohort study amongst**  
4 **80,000 adults**  
5

6 *Running head:* Psychometric properties of Jenkins Sleep Scale  
7

8 Juhani Juhola MD<sup>1</sup>, Jari Arokoski MD, PhD<sup>2</sup>, Jenni Ervasti<sup>3</sup>, Mika Kivimäki PhD<sup>3,4,5</sup>, Jussi Vahtera PhD, MD<sup>6</sup>,  
9 Saana Myllyntausta<sup>6,7</sup>, Mikhail Saltychev MD, PhD<sup>1</sup>  
10

11  
12 <sup>1</sup> Department of Physical and Rehabilitation Medicine, Turku University Hospital and University of Turku,  
13 Turku, Finland  
14

15  
16 <sup>2</sup> Department of Physical and Rehabilitation Medicine, Helsinki University Hospital and University of  
17 Helsinki, Helsinki, Finland  
18

19  
20 <sup>3</sup> Finnish Institute of Occupational Health, Helsinki, Finland  
21

22 <sup>4</sup> Clinicum, Faculty of Medicine, University of Helsinki, Helsinki, Finland  
23

24 <sup>5</sup> Department of Epidemiology and Public Health, University College London Medical School, London,  
25 United Kingdom  
26

27  
28 <sup>6</sup> Department of Public Health, University of Turku and Turku University Hospital, Turku, Finland  
29

30 <sup>7</sup> School of Educational Sciences and Psychology, Psychology, University of Eastern Finland, Joensuu,  
31 Finland  
32

33  
34 *Address for correspondence:*  
35

36 Juhani Juhola, Department of Physical and Rehabilitation Medicine, Turku University Hospital, PO Box 52,  
37 FI-20521, Turku, Finland  
38

39  
40 E-mail: [juhani.juhola@turku.fi](mailto:juhani.juhola@turku.fi), Tel.: +358 50 527 57 56, Fax: +358 2 313 3730  
41

42  
43 *Keywords:* sleep disorder, psychometrics, validity  
44  
45  
46  
47  
48  
49  
50  
51  
52  
53  
54  
55  
56  
57  
58  
59  
60

## ABSTRACT

### Objectives

To assess the internal consistency and construct validity of the Finnish translation of the Jenkins Sleep Scale (JSS) in a large healthy working-age population with diverse work characteristics.

### Design

Survey-based cross-sectional cohort study.

### Setting

Survey conducted by an institute of occupational health.

### Participants

Employees of 10 towns and 6 hospital districts.

### Primary and secondary outcome measures

The internal consistency defined by a Cronbach's alpha. Exploratory and confirmatory factor analyses to evaluate the construct structure of the JSS.

### Results

Of 81,136 respondents, 14,890 (18%) were men and 66,246 (82%) were women. Their average age was 52.1 (13.2) years. Of the respondents, 41,823 (52%) were sleeping seven or less hours per night. The mean JSS total score was 6.4 (4.8) points. The JSS demonstrated high internal consistency with an alpha of 0.80 (lower 95% CL 0.80). Exploratory factor analysis supported a one-factor solution with eigenvalue of 1.94. Confirmatory factor analysis showed that all four items were positively correlated with a single common factor explaining 44% to 61% of common factor's variance.

### Conclusions

The Finnish translation of Jenkins Sleep Scale was found to be a unidimensional scale with good internal consistency. As such, the scale may be recommended as a practicable questionnaire when studying sleep difficulties in a healthy working-age population.

### Strengths and limitations of this study

To our knowledge, this was the first study on the psychometrics of the Finnish translation of the JSS.



1  
2 The cohort of over 80,000 respondents represented a wide spectrum of occupations from managers to  
3 manual workers.  
4

5  
6 Inequality in gender distribution may overestimate the prevalence of sleep difficulties in the studied  
7 cohort.  
8  
9

10 The JSS may be recommended as an easy-to-do questionnaire instrument for the studying of sleep  
11 difficulties in a healthy working-age population.  
12  
13

#### 14 15 **Contributorship statement**

16  
17 All the authors (JJ, SM, JA, JE, MS, MK and JV) substantially contributed to the conception and design of  
18 the work, drafting the work and revised it critically for important intellectual content, interpreted the  
19 data, and finally approved the version published. All the authors achieved an agreement to be accountable  
20 for all aspects of the work in ensuring that questions related to the accuracy or integrity of any part of the  
21 work are appropriately investigated and resolved. JJ was responsible for preparing the first draft. MS was  
22 responsible for the main data analysis. JV and MK were responsible for the acquisition of data. JV was a  
23 guarantor.  
24  
25  
26  
27  
28  
29

#### 30 31 **Competing interests**

32  
33 The authors do not have any associations with commercial entities that provided support for the work  
34 reported in the submitted manuscript. The authors do not have any associations with commercial entities  
35 that could be viewed as having an interest in the general area of the submitted manuscript. The authors  
36 do not have any similar financial associations involving their spouse or their children under 18 years of  
37 age. The authors do not have any non-financial associations that may be relevant to the submitted  
38 manuscript.  
39  
40  
41  
42  
43

#### 44 45 **Funding**

46  
47 This study was supported by funding granted by the Juho Vainio Foundation, Finland (to TL); the Academy  
48 of Finland (Grants 286294, 294154 and 319246 to SS; 633666 to MK; 309526 to TL); the Finnish Ministry  
49 of Education and Culture (to SS); NordForsk (to MK and JV); the UK MRC (Grant K013351 to MK) and The  
50 Finnish Environment Fund (Grants 190172 and 118060 to SM)  
51  
52  
53

#### 54 55 **Data sharing statement**

56  
57 The data generated by this research that supports the article will be made available through a request to  
58 a corresponding author forwarding the request to JE, who manages the data of the survey, upon  
59 publication of the article. Only anonymized questionnaire data is available to share.  
60

## INTRODUCTION

Several different questionnaires have been developed to assess the severity of sleep problems<sup>1</sup>. The Jenkins Sleep Scale (JSS), developed as a brief and standardized test for sleep disturbances in 1988, has been one of the most commonly used questionnaires in epidemiological studies<sup>1-4</sup>. Comparing to other similar measures, the JSS is a short questionnaire focusing on roughly recognizing sleep difficulties. That is unlike to more complex scales, like Insomnia Severity Index, which quantify also the impact of sleep disturbance on the level of daily functioning. The JSS has been translated in several languages<sup>5-10</sup> and found to be valid and reliable amongst patients with different health problems including rheumatoid arthritis<sup>10</sup>, psoriatic arthritis<sup>9</sup>, ankylosing spondylitis<sup>7</sup>, fibromyalgia<sup>5,11</sup>, chest pain<sup>12</sup>, post cardiac surgery patients<sup>2</sup>, patients with cognitive disorders<sup>13</sup> and epilepsy<sup>14</sup>. However, only a few studies have evaluated the psychometric properties of the JSS in large non-clinical populations<sup>2,3,8,15,16</sup>.

Previous studies have found the JSS to be internally consistent amongst patients with fibromyalgia<sup>5,11</sup>, rheumatoid arthritis<sup>10</sup>, ankylosing spondylitis<sup>7</sup> and psoriatic arthritis<sup>9</sup> as indicated by Cronbach's alphas between 0.7 and 0.9. Several studies has assessed the internal consistency of the JSS in general and/or healthy populations similarly reporting good to excellent Cronbach's alpha that vary between 0.8 and 0.9<sup>2,3,6,8,15,16</sup>. Only three previous studies have assessed the factor structure of the JSS finding the JSS to be a unidimensional scale<sup>3,6,8</sup>. The construct structure of the JSS analysis has been assessed by a single study using a confirmatory factor that produced strong correlations with common factor for all four items<sup>3</sup>. Like any brief screening instrument, the JSS has shortcomings, specifically the inability to address the spectrum of sleep difficulties. Hence it can only be used as a preliminary screener of sleep disturbance<sup>17</sup>.

Overall, there is uncertainty concerning the psychometric behavior of the JSS especially regarding its factor structure in healthy and/or general populations. Concerning a general population, previous research mostly focused on the internal consistency of JSS and its reliability. Instead, other important points, like e.g. factors structure, remained practically unknown. Additionally, the psychometric properties of Finnish translation of the JSS have not been studied yet. To address this limitation, the aim of this study was to assess the internal consistency and construct validity of the Finnish translation of the JSS in a large healthy working-age population.

## METHODS

The data were derived from the Finnish Public Sector (FPS) study, an on-going prospective cohort study of employees in the municipal services of 10 Finnish towns and 21 public hospitals. The eligible population from the register cohort of FPS (n=151 618) included those who had been employed for a minimum of 6 months at the participating organisations between 1991 and 2005. Employers' records have been used to identify the eligible employees for a nested survey cohort to whom questionnaire surveys have been repeated every 4 years since 2000<sup>18</sup>. For this study, the data were sourced from the survey in 2016 – 2017 administered to the FPS sub-cohorts (average response rate 70%). Individual-level survey data cannot be made publicly available, but information on the data and analyses are available upon request to the corresponding author. The ethics committee of the Hospital District of Helsinki and Uusimaa has approved the study.

Age was defined in full years at the time of survey response. Body mass index (BMI) was defined as weight in kg/height in m<sup>2</sup>. The level of physical activity was calculated from the survey responses and converted into metabolic equivalent of task (MET) . Alcohol consumption was obtained from the survey and converted into g/week. The respondents were asked about their usual amount of sleep hours per 24 hours with the following nine response alternatives: ≤6 hours, 6.5 hours, 7 hours, 7.5 hours, 8 hours, 8.5 hours, 9 hours, 9.5 hours, and ≥10 hours.

Jenkins Sleep Scale (JSS) is a four-item questionnaire to follow common sleep problems<sup>2</sup>. The frequency of sleep problems in the last month is evaluated using four items: the difficulty to fall asleep, wake up at night, difficulty to stay asleep, and nonrestorative sleep (i.e. waking up after the usual amount of sleep feeling tired and worn out). Each item is rated on a Likert-like scale from zero to five, where zero is “never”, 1 is “1- 3 days”, 2 is “about 1 night/week”, 3 is “2-4 nights/week”, 4 is “5-6 nights/week” and 5 is “almost every night”. The total score is a simple sum of all four items' scores and ranges from zero (no sleep problems) to 20 (most sleep problems). The score of 11 is a cut-off – a score <12 is defined as little of sleep disturbances and a score >11 is understood as high frequency of sleep disturbances<sup>19</sup>. Another way to dichotomize the JSS is considering sleep difficulties being present if there is at least one “yes” response (>15 nights in the previous 4 weeks) to any item.

### *Patient and public involvement*

Participants of research were not involved in setting the study question and outcome measures and were not involved in the design and implementation of the study or writing the manuscript.

### **Statistical analysis**

#### *Internal consistency and exploratory factor analysis*

1  
2 The internal consistency was defined by a Cronbach's alpha reported along with its one-sided (lower) 95%  
3 confidence limit (95% CL). The  $\alpha \geq 0.9$  was considered excellent,  $\geq 0.8$  good,  $\geq 0.7$  acceptable,  $\geq 0.6$   
4 questionable,  $\geq 0.5$  poor, and  $< 0.5$  was considered unacceptable<sup>20,21</sup>. Exploratory factor analysis (EFA) was  
5 used to approximate the construct structure of the JSS. The goal was to determine whether the JSS  
6 measures only one latent trait (= sleep disturbances) or if there are other possible significant latent  
7 variables affecting the results. The results were analyzed both numerically and graphically. Exploratory  
8 factor analysis (principal factors) was applied with a minimum eigenvalue for retention set at  $> 1.0$  (Kaiser's  
9 rule). The varimax rotation was applied. Retained and excluded factors were also explored visually on a  
10 scree plot along with the parallel analysis.  
11  
12  
13  
14  
15  
16

### 17 *Confirmatory factor analysis*

18  
19  
20 The estimation procedure used the maximum likelihood method considering covariances supplied as  
21 input being unbiased. For simplicity, the estimates were reported in standardized form as correlation  
22 coefficients. A correlation  $< 0.2$  was considered poor, from 0.21 to 0.4 fair, from 0.41 to 0.6 moderate,  
23 from 0.61 to 0.8 substantial, and  $> 0.8$  perfect<sup>22</sup>. In addition, the coefficients of determination were  
24 calculated to show the proportion of variance in common "sleep disturbances" construct that can be  
25 explained by the items. Finally, the coefficient of determination for the entire model was calculated.  
26  
27  
28  
29

30  
31 In order to assess how well the model matches the observed data, the root mean square error of  
32 approximation (RMSEA) was used as a primary index. First, the model fit was tested assuming there were  
33 no covariances between unique factors. After that, the modification indices suggested by the software  
34 were used to add covariance between factors (double-headed arrows in Figure 1) one at a time, each time  
35 testing the RMSEA closeness to the value of  $< 0.05$ , or, at least,  $< 0.08$  – the threshold for accepting the  
36 model fit. Every insertion was considered plausible if it made logical sense and did not violate the  
37 assumption that the common and the unique factors are uncorrelated. After achieving the RMSEA value  
38 of  $< 0.05$ , no further covariances were imputed. The goodness of fit was assessed using a chi-square test.  
39 Also, the Akaike's and Bayesian information criteria (AIC and BIC), comparative fit index (CFI) and the  
40 Tucker-Lewis index (TLI) were calculated. The AIC and BIC were considered good if they were close to 1.0.  
41  
42  
43  
44  
45  
46  
47  
48 The analyses were performed using Stata/IC Statistical Software: Release 16. College Station (StataCorp  
49 LP, TX, USA).  
50  
51  
52  
53  
54  
55  
56  
57  
58  
59  
60

## RESULTS

Of 81,136 respondents, 14,890 (18%) were men and 66,246 (82%) were women. Their mean age was 52.1 (standard deviation [SD] = 13.2) years, body mass index 26.2 (SD = 4.7) kg/m<sup>2</sup>, physical activity 29.4 (SD = 25.3) METs/week, and alcohol consumption 49.7 (SD = 90.9) g/week (equivalent to 5 units of alcohol per week). Of the respondents, 41,823 (52%) were sleeping seven or less hours per night. The mean JSS total score was 6.4 (4.8) points.

The JSS demonstrated a substantial internal consistency with alpha 0.80 (lower 95% CL 0.80). The exploratory factor analysis resulted in one retaining factor with eigenvalue of 1.94 based on Kaiser criterion (Table 1 and Figure 2). Three other factors had eigenvalues between -0.03 and -0.18 and thus explained variance less the observed variables. The parallel analysis of scree plot confirmed the unidimensional structure of JSS (Table 2).

The confirmatory factor analysis showed that all four items positively correlated with a common factor explaining from 44% up to 61% of the variance of the common factor (Table 3 and Figure 1). The highest correlation 0.78 ( $r^2=0.61$ ) was observed for the third item "waking up and trouble falling asleep again". Other items demonstrated similar and slightly lower correlations between 0.66 and 0.67 ( $r^2=0.44$  to 0.45). The model obtained a good fit after adding one covariance between second and third items: 0.26 (95% confidence interval 0.25 to 0.28). After that, the RMSEA of the model was 0.03 (Table 4).

## DISCUSSION

In this large cohort study, the JSS was found to be an internally consistent scale. Exploratory factor analysis suggested the unidimensionality of the JSS. In addition, confirmatory factor analysis demonstrated a single-factor structure with only one mild aberration; the JSS item “waking up and trouble falling asleep again” seemed to show higher coefficient of determination than any of the other items.

The generalizability of the results might be weakened by the gender disbalance of the studied cohort (women were predominated). This disbalance was due to the fact that fewer men are involved in the studied areas of public sector. Also, the mean age of study participants was 52 years and, therefore, the results described, in the first instance, people in the last third of their working life span. While it had been widely used for over two decades, the Finnish translation of JSS had never undergone a full linguistic validation process which might affect its equivalency with an English version. The response rate was 70% and there was no analysis of whether the non-respondents’ demographic characteristics might affect the results.

To our knowledge, this was the first study on the psychometrics of the Finnish translation of the JSS. The cohort of over 80,000 respondents represented a wide spectrum of occupations from managers to manual workers. However, the generalizability of the results might be compromised by the following aspects. The studied cohort was predominated by women. It has previously been stated that sleep problems are more common among women meaning that this inequality in gender distribution may overestimate the prevalence of sleep difficulties in the studied cohort<sup>3</sup>. While overall working age could be understood as an age between early adulthood and the age of retirement, the mean age of the respondents was 52 years, covering mainly the last third of the working life span.

The results are in line with several previous studies that have found the JSS to be a unidimensional scale with excellent internal consistency<sup>3 6 8</sup>. The Cronbach’s alpha of 0.8 seen in the present study was close to the estimates reported by previous research in both general population and populations of people with different health conditions<sup>2 3 5-11 15 16</sup>. While the JSS has been studied by employing alpha and exploratory factor analysis by several studies, a confirmatory factor analysis has previously been used by only a single study (Tibubos et al. 2020). The correlations of four items with a common factor seen in study by Tibubos et al. resembled the estimates observed in the present study with one exception. The present results demonstrated the greatest correlation for the item “waking up and trouble falling asleep again”, being in line with Tibubos et al., but, contrary to our result, item “waking up feeling tired” had the smallest (out of four) estimate in their study. This difference might be explained by differences in the studied cohorts e.g. in gender distribution and work status. Indeed, the present study represents a population that is probably healthier than general population. In addition, it is possible, though unlikely, that some differences might have occurred due to the linguistic variability between the two translations.

1  
2 Further research may reveal more details on the JSS psychometrics, for example, its properties based on  
3 an item response theory analysis. Especially confirmatory factor analysis may be recommended for future  
4 research, as the knowledge on the JSS factor structure is still scarce.  
5  
6

### 7 **Conclusions**

8  
9 The JSS was found to be a unidimensional scale with good internal consistency. As such, the JSS may be  
10 recommended as an easy-to-do questionnaire instrument for the studying of sleep difficulties in a healthy  
11 working-age population.  
12  
13  
14  
15  
16  
17  
18  
19  
20  
21  
22  
23  
24  
25  
26  
27  
28  
29  
30  
31  
32  
33  
34  
35  
36  
37  
38  
39  
40  
41  
42  
43  
44  
45  
46  
47  
48  
49  
50  
51  
52  
53  
54  
55  
56  
57  
58  
59  
60

For peer review only

**TABLES AND FIGURES**

Table 1. Exploratory factor analysis of loadings of the Jenkins Sleep Scale items

| Jenkins Sleep Scale Items                     | Factor #1 | Uniqueness |
|-----------------------------------------------|-----------|------------|
| Trouble falling asleep                        | 0.62      | 0.61       |
| Waking up but no trouble falling asleep again | 0.72      | 0.48       |
| Waking up and trouble falling asleep again    | 0.79      | 0.37       |
| Waking up feeling tired                       | 0.63      | 0.60       |

For peer review only



Table 2. Parallel analysis for factor analysis (over 10 replications), eigenvalues.

| Factors | Factor analysis | Parallel analysis | Difference |
|---------|-----------------|-------------------|------------|
| 1       | 1.94            | 0.01              | 1.93       |
| 2       | -0.03           | 0.00              | -0.03      |
| 3       | -0.12           | 0.00              | -0.11      |
| 4       | -0.18           | -0.01             | -0.17      |

For peer review only

Table 3. Confirmatory factor analysis of Jenkins Sleep Scale – correlation between observed and predicted estimates (r) along with coefficient of determination ( $r^2$ )

| Estimates                                     | Variance |           |          | r    | 95% CI |       | $r^2$ |
|-----------------------------------------------|----------|-----------|----------|------|--------|-------|-------|
|                                               | Fitted   | Predicted | Residual |      | Lower  | Upper |       |
| Trouble falling asleep                        | 1.63     | 0.71      | 0.92     | 0.66 | 0.66   | 0.67  | 0.44  |
| Waking up but no trouble falling asleep again | 2.83     | 1.29      | 1.55     | 0.67 | 0.67   | 0.68  | 0.45  |
| Waking up and trouble falling asleep again    | 2.40     | 1.47      | 0.92     | 0.78 | 0.78   | 0.79  | 0.61  |
| Waking up feeling tired                       | 2.28     | 1.02      | 1.26     | 0.67 | 0.66   | 0.68  | 0.45  |
| Overall                                       |          |           |          |      |        |       | 0.78  |

For peer review only

Table 4. Confirmatory factor analysis of Jenkins Sleep Scale– goodness of fit

| Fit statistic        | Value     | Description                              |
|----------------------|-----------|------------------------------------------|
| Likelihood ratio     |           |                                          |
| chi <sup>2</sup>     | 84.49     | model vs. saturated                      |
| p-value              | <0.01     |                                          |
| Population error     |           |                                          |
| RMSEA                | 0.03      | Root mean squared error of approximation |
| 90% CI, lower bound  | 0.03      |                                          |
| 90% CI, upper bound  | 0.04      |                                          |
| p-value              | 1.00      | Probability RMSEA ≤ 0.05                 |
| Information criteria |           |                                          |
| AIC                  | 1,036,000 | Akaike's information criterion           |
| BIC                  | 1,037,000 | Bayesian information criterion           |
| Baseline comparison  |           |                                          |
| CFI                  | 1.00      | Comparative fit index                    |
| TLI                  | 1.00      | Tucker-Lewis index                       |
| Size of residuals    |           |                                          |
| SRMR                 | 0.01      | Standardized root mean squared residual  |
| CD                   | 0.78      | Coefficient of determination             |

1  
2 Figure 1. Confirmatory factor analysis of Jenkins Sleep Scale.  
3

4  
5 “ $\epsilon$ ”-circles represent a measurement error associated with an observed variable (variance that is  
6  
7 predicted by the latent factor). Estimates placed between  $\epsilon$ -errors and observed variables represent the  
8  
9 amount of variance in higher level data that can be explained by a particular variable.  
10  
11

12 Figure 2. Exploratory factor analysis of Jenkins Sleep Scale – scree plot with parallel analysis.  
13  
14  
15  
16  
17  
18  
19  
20  
21  
22  
23  
24  
25  
26  
27  
28  
29  
30  
31  
32  
33  
34  
35  
36  
37  
38  
39  
40  
41  
42  
43  
44  
45  
46  
47  
48  
49  
50  
51  
52  
53  
54  
55  
56  
57  
58  
59  
60

For peer review only

## REFERENCES

1. Lallukka T, Dregan A, Armstrong D. Comparison of a sleep item from the General Health Questionnaire-12 with the Jenkins Sleep Questionnaire as measures of sleep disturbance. *J Epidemiol* 2011;21(6):474-80. doi: 10.2188/jea.je20110023 [published Online First: 2011/10/12]
2. Jenkins CD, Stanton BA, Niemcryk SJ, et al. A scale for the estimation of sleep problems in clinical research. *J Clin Epidemiol* 1988;41(4):313-21. doi: 10.1016/0895-4356(88)90138-2 [published Online First: 1988/01/01]
3. Tibubos AN, Zenger M, Schmalbach B, et al. Measurement invariance, validation and normative data of the Jenkins Sleep Scale-4 (JSS-4) in the German general population across the life span. *J Psychosom Res* 2020;130:109933. doi: 10.1016/j.jpsychores.2020.109933 [published Online First: 2020/01/18]
4. Vahtera J, Pentti J, Helenius H, et al. Sleep disturbances as a predictor of long-term increase in sickness absence among employees after family death or illness. *Sleep* 2006;29(5):673-82. doi: 10.1093/sleep/29.5.673 [published Online First: 2006/06/16]
5. Unal-Ulutatar C, Ozsoy-Unubol T. Psychometric properties of Turkish version of Jenkins sleep scale in fibromyalgia syndrome. *Adv Rheumatol* 2020;60(1):22. doi: 10.1186/s42358-020-0123-3 [published Online First: 2020/04/18]
6. Salman M, Khan AH, Sulaiman SAS, et al. Psychometric Validation of the Urdu Version of the Jenkins Sleep Evaluation Questionnaire. *Age (mean±SD)* 2018;21:0.84.
7. Duruoz MT, Ulutatar F, Ozturk EC, et al. Assessment of the validity and reliability of the Jenkins Sleep Scale in ankylosing spondylitis. *Int J Rheum Dis* 2019;22(2):275-79. doi: 10.1111/1756-185x.13447 [published Online First: 2018/12/20]
8. Reis C, Mestre C, Tecedeiro M, et al. Translation, cross-cultural adaptation and psychometric properties of the Jenkins Sleep Scale in a sample of Portuguese shift workers. 2014
9. Duruöz MT, Erdem D, Gencer K, et al. Validity and reliability of the Turkish version of the Jenkins Sleep Scale in psoriatic arthritis. *Rheumatol Int* 2018;38(2):261-65. doi: 10.1007/s00296-017-3911-2 [published Online First: 2017/12/19]

- 1  
2 10. Duruöz MT, Ünal Ç, Ulutatar F, et al. The Validity and Reliability of Turkish Version of the Jenkins Sleep  
3  
4 Evaluation Scale in Rheumatoid Arthritis. *Arch Rheumatol* 2018;33(2):160-67. doi:  
5  
6 10.5606/ArchRheumatol.2018.6376 [published Online First: 2018/09/13]  
7
- 8  
9 11. Crawford BK, Pault EC, Lai C, et al. Assessing sleep in fibromyalgia: investigation of an alternative  
10  
11 scoring method for the Jenkins Sleep Scale based on data from randomized controlled studies.  
12  
13 *Clin Exp Rheumatol* 2010;28(6 Suppl 63):S100-9. [published Online First: 2011/02/18]  
14
- 15  
16 12. Jerlock M, Gaston-Johansson F, Kjellgren KI, et al. Coping strategies, stress, physical activity and sleep  
17  
18 in patients with unexplained chest pain. *BMC Nurs* 2006;5:7. doi: 10.1186/1472-6955-5-7  
19  
20 [published Online First: 2006/11/02]  
21
- 22  
23 13. Bharambe V, Larner AJ. Functional cognitive disorders: demographic and clinical features contribute  
24  
25 to a positive diagnosis. *Neurodegener Dis Manag* 2018;8(6):377-83. doi: 10.2217/nmt-2018-0025  
26  
27 [published Online First: 2018/11/20]  
28
- 29  
30 14. Aji B, Elhadd K, Larner A. Cognitive Symptoms in Patients with Epilepsy: Role of Sleep and Mood  
31  
32 Disturbance. *Journal of Sleep Disorders & Therapy* 2019;8(1):1-4.  
33
- 34  
35 15. Nasermoaddeli A, Sekine M, Kumari M, et al. Association of sleep quality and free time leisure activities  
36  
37 in Japanese and British civil servants. *J Occup Health* 2005;47(5):384-90. doi: 10.1539/joh.47.384  
38  
39 [published Online First: 2005/10/19]  
40
- 41  
42 16. Ornat L, Martínez-Dearth R, Chedraui P, et al. Assessment of subjective sleep disturbance and related  
43  
44 factors during female mid-life with the Jenkins Sleep Scale. *Maturitas* 2014;77(4):344-50. doi:  
45  
46 10.1016/j.maturitas.2014.01.005 [published Online First: 2014/02/18]  
47
- 48  
49 17. Shahid A, Wilkinson K, Marcu S, et al. Jenkins Sleep Scale. In: Shahid A, Wilkinson K, Marcu S, et al.,  
50  
51 eds. *STOP, THAT and one hundred other sleep scales*. New York: Springer 2011:203-04.  
52
- 53  
54 18. Kivimäki M, Lawlor DA, Smith GD, et al. Socioeconomic position, co-occurrence of behavior-related  
55  
56 risk factors, and coronary heart disease: the Finnish Public Sector study. *American journal of public  
57  
58 health* 2007;97(5):874-79.  
59
- 60  
61 19. Monterrosa-Castro Á, Portela-Buelvas K, Salgado-Madrid M, et al. Instruments to study sleep  
62  
63 disorders in climacteric women. *Sleep Science* 2016;9(3):169-78.

- 1  
2 20. George D, Mallery P. SPSS for Windows step by step: A simple guide and reference. Boston: Allyn &  
3  
4 Bacon 2003.  
5  
6 21. Taber KS. The Use of Cronbach's Alpha When Developing and Reporting Research Instruments in  
7  
8 Science Education. *Research in Science Education* 2018;48:1273–96.  
9  
10 22. Akoglu H. User's guide to correlation coefficients. *Turk J Emerg Med* 2018;18(3):91-93. doi:  
11  
12 10.1016/j.tjem.2018.08.001 [published Online First: 2018/09/08]  
13  
14  
15  
16  
17  
18  
19  
20  
21  
22  
23  
24  
25  
26  
27  
28  
29  
30  
31  
32  
33  
34  
35  
36  
37  
38  
39  
40  
41  
42  
43  
44  
45  
46  
47  
48  
49  
50  
51  
52  
53  
54  
55  
56  
57  
58  
59  
60

For peer review only

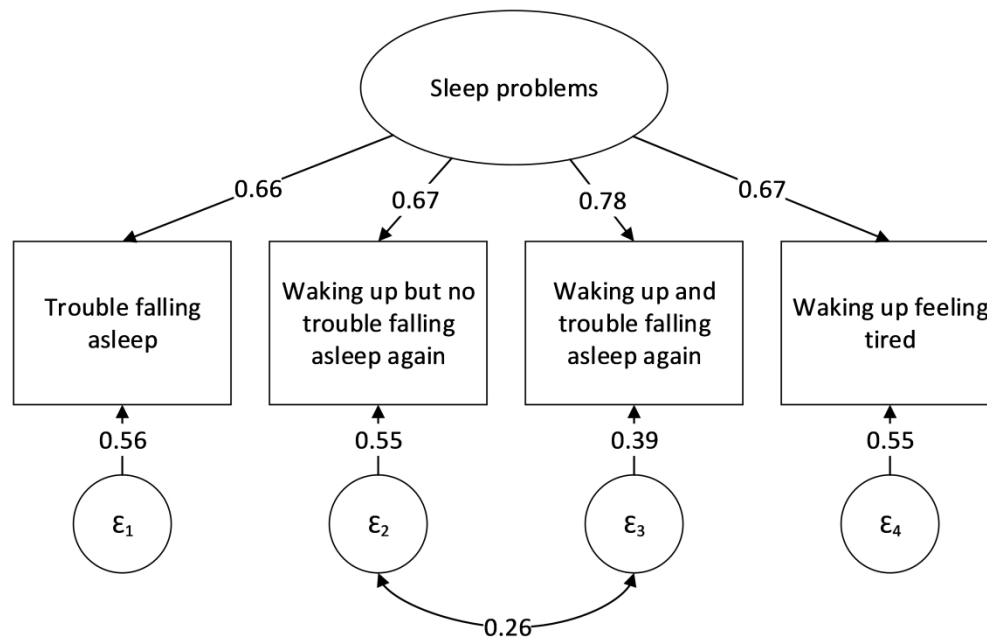

Figure 1. Confirmatory factor analysis of Jenkins Sleep Scale.

" $\epsilon$ "-circles represent a measurement error associated with an observed variable (variance that is predicted by the latent factor). Estimates placed between  $\epsilon$ -errors and observed variables represent the amount of variance in higher level data that can be explained by a particular variable.

330x214mm (300 x 300 DPI)



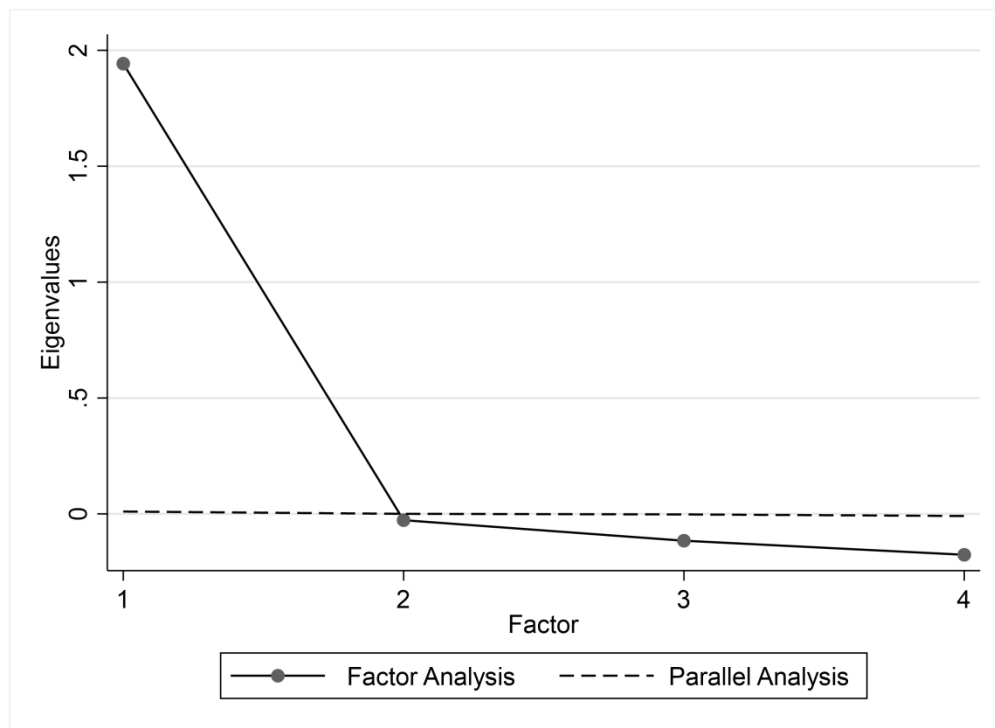

Figure 2. Exploratory factor analysis of Jenkins Sleep Scale – scree plot with parallel analysis.

233x169mm (300 x 300 DPI)

## STROBE Statement—checklist of items that should be included in reports of observational studies

|                              | Item No. | Recommendation                                                                                                                                                                                                                                                                                            | Page No. |
|------------------------------|----------|-----------------------------------------------------------------------------------------------------------------------------------------------------------------------------------------------------------------------------------------------------------------------------------------------------------|----------|
| <b>Title and abstract</b>    | 1        | (a) Indicate the study's design with a commonly used term in the title or the abstract                                                                                                                                                                                                                    | 1        |
|                              |          | (b) Provide in the abstract an informative and balanced summary of what was done and what was found                                                                                                                                                                                                       | 2        |
| <b>Introduction</b>          |          |                                                                                                                                                                                                                                                                                                           |          |
| Background/rationale         | 2        | Explain the scientific background and rationale for the investigation being reported                                                                                                                                                                                                                      | 4        |
| Objectives                   | 3        | State specific objectives, including any prespecified hypotheses                                                                                                                                                                                                                                          | 4        |
| <b>Methods</b>               |          |                                                                                                                                                                                                                                                                                                           |          |
| Study design                 | 4        | Present key elements of study design early in the paper                                                                                                                                                                                                                                                   | 5        |
| Setting                      | 5        | Describe the setting, locations, and relevant dates, including periods of recruitment, exposure, follow-up, and data collection                                                                                                                                                                           | 5        |
| Participants                 | 6        | (a) <i>Cohort study</i> —Give the eligibility criteria, and the sources and methods of selection of participants. Describe methods of follow-up                                                                                                                                                           | 5        |
|                              |          | <i>Case-control study</i> —Give the eligibility criteria, and the sources and methods of case ascertainment and control selection. Give the rationale for the choice of cases and controls                                                                                                                |          |
|                              |          | <i>Cross-sectional study</i> —Give the eligibility criteria, and the sources and methods of selection of participants                                                                                                                                                                                     |          |
|                              |          | (b) <i>Cohort study</i> —For matched studies, give matching criteria and number of exposed and unexposed<br><i>Case-control study</i> —For matched studies, give matching criteria and the number of controls per case                                                                                    |          |
| Variables                    | 7        | Clearly define all outcomes, exposures, predictors, potential confounders, and effect modifiers. Give diagnostic criteria, if applicable                                                                                                                                                                  | 5        |
| Data sources/<br>measurement | 8*       | For each variable of interest, give sources of data and details of methods of assessment (measurement). Describe comparability of assessment methods if there is more than one group                                                                                                                      | 5        |
| Bias                         | 9        | Describe any efforts to address potential sources of bias                                                                                                                                                                                                                                                 | 5        |
| Study size                   | 10       | Explain how the study size was arrived at                                                                                                                                                                                                                                                                 | 5        |
| Quantitative variables       | 11       | Explain how quantitative variables were handled in the analyses. If applicable, describe which groupings were chosen and why                                                                                                                                                                              | 5        |
| Statistical methods          | 12       | (a) Describe all statistical methods, including those used to control for confounding                                                                                                                                                                                                                     | 6        |
|                              |          | (b) Describe any methods used to examine subgroups and interactions                                                                                                                                                                                                                                       | 6        |
|                              |          | (c) Explain how missing data were addressed                                                                                                                                                                                                                                                               | 6        |
|                              |          | (d) <i>Cohort study</i> —If applicable, explain how loss to follow-up was addressed<br><i>Case-control study</i> —If applicable, explain how matching of cases and controls was addressed<br><i>Cross-sectional study</i> —If applicable, describe analytical methods taking account of sampling strategy | 6        |

|                          |     |                                                                                                                                                                                                              |     |
|--------------------------|-----|--------------------------------------------------------------------------------------------------------------------------------------------------------------------------------------------------------------|-----|
|                          |     | (e) Describe any sensitivity analyses                                                                                                                                                                        | 6   |
| <b>Results</b>           |     |                                                                                                                                                                                                              |     |
| Participants             | 13* | (a) Report numbers of individuals at each stage of study—eg numbers potentially eligible, examined for eligibility, confirmed eligible, included in the study, completing follow-up, and analysed            | 7   |
|                          |     | (b) Give reasons for non-participation at each stage                                                                                                                                                         | 7   |
|                          |     | (c) Consider use of a flow diagram                                                                                                                                                                           | 7   |
| Descriptive data         | 14* | (a) Give characteristics of study participants (eg demographic, clinical, social) and information on exposures and potential confounders                                                                     | 7   |
|                          |     | (b) Indicate number of participants with missing data for each variable of interest                                                                                                                          | 7   |
|                          |     | (c) <i>Cohort study</i> —Summarise follow-up time (eg, average and total amount)                                                                                                                             | 7   |
| Outcome data             | 15* | <i>Cohort study</i> —Report numbers of outcome events or summary measures over time                                                                                                                          | 7   |
|                          |     | <i>Case-control study</i> —Report numbers in each exposure category, or summary measures of exposure                                                                                                         | 7   |
|                          |     | <i>Cross-sectional study</i> —Report numbers of outcome events or summary measures                                                                                                                           | 7   |
| Main results             | 16  | (a) Give unadjusted estimates and, if applicable, confounder-adjusted estimates and their precision (eg, 95% confidence interval). Make clear which confounders were adjusted for and why they were included | 7   |
|                          |     | (b) Report category boundaries when continuous variables were categorized                                                                                                                                    | 7   |
|                          |     | (c) If relevant, consider translating estimates of relative risk into absolute risk for a meaningful time period                                                                                             | 7   |
| Other analyses           | 17  | Report other analyses done—eg analyses of subgroups and interactions, and sensitivity analyses                                                                                                               | 7   |
| <b>Discussion</b>        |     |                                                                                                                                                                                                              |     |
| Key results              | 18  | Summarise key results with reference to study objectives                                                                                                                                                     | 8   |
| Limitations              | 19  | Discuss limitations of the study, taking into account sources of potential bias or imprecision. Discuss both direction and magnitude of any potential bias                                                   | 8   |
| Interpretation           | 20  | Give a cautious overall interpretation of results considering objectives, limitations, multiplicity of analyses, results from similar studies, and other relevant evidence                                   | 8-9 |
| Generalisability         | 21  | Discuss the generalisability (external validity) of the study results                                                                                                                                        | 8-9 |
| <b>Other information</b> |     |                                                                                                                                                                                                              |     |
| Funding                  | 22  | Give the source of funding and the role of the funders for the present study and, if applicable, for the original study on which the present article is based                                                | 3   |
